# Supplementary material
Source: PubMed Central journal article supplement (PMC4027547)
Supplement: ml400080t_si_001.pdf [file ml400080t_si_001.pdf]

## ***Identification of selective nanomolar inhibitors of the human neuraminidase, NEU4***

Amgad Albohy<sup>1</sup>, Yi Zhang<sup>1</sup>, Victoria Smutova<sup>2</sup>, Alexey V. Pshezhetsky<sup>2</sup>, and

Christopher W. Cairo<sup>1\*</sup>

<sup>1</sup>Alberta Glycomics Center, Department of Chemistry, University of Alberta,  
Edmonton Alberta T6G 2G2, Canada

<sup>2</sup>Division of Medical Genetics, Centre Hospitaliere Universitaire Sainte-Justine,  
University of Montreal, Montreal, Quebec, Canada. Department of Anatomy; Cell  
Biology, Faculty of Medicine, McGill University, Montreal, Quebec, Canada

\*Corresponding author. Tel.: 780 492 0377; fax: 780 492 8231; e-mail:  
ccairo@ualberta.ca

|                                                                                     |    |
|-------------------------------------------------------------------------------------|----|
| General protocols.....                                                              | 2  |
| Table SI1: HPLC Gradient elution program for testing compound purity. ....          | 2  |
| Table SI2: HPLC and HRMS results for compounds (1-11). ....                         | 3  |
| Figure SI1: HPLC traces of the tested compounds (1-11). ....                        | 4  |
| Figure SI2: HRMS spectra of the tested compounds (1-11). ....                       | 15 |
| Figure SI3: IC50 curves of compounds 1-11 with NEU1, NEU2, NEU3 and NEU4. ....      | 25 |
| Figure SI4: K <sub>i</sub> curves for compounds 6 and 7 with NEU4. ....             | 33 |
| Figure SI5: Quality of NEU4 homology model.....                                     | 35 |
| Figure SI6: Convergence and total energy during molecular dynamics calculation..... | 36 |
| Figure SI7: Selectivity of compound 6 for NEU4 over NEU2 .....                      | 37 |
| Characterization of compound 6 ( <sup>1</sup> H NMR and HRMS). ....                 | 38 |

## General protocols

All reagents used were purchased from commercial sources, such as Sigma-Aldrich and Acros Organics, and used without further purification unless otherwise noted. All reactions were carried out under a positive pressure of argon at room temperature unless otherwise indicated. Reactions were monitored by analytical TLC on silica gel 60-F<sub>254</sub> (0.25mm, Silicycle, Quebec, Canada) and the spots were visualized under UV light (254 nm) or stained by charring with ceric ammonium molybdate (CAM). Organic solvents were evaporated under reduced pressure, and organic products were purified by flash column chromatography on silica gel (230-400 mesh, Silicycle, Quebec, Canada) or by HPLC (Waters). <sup>1</sup>H NMR spectra were acquired on Varian 400, 500 or 600 MHz instruments at room temperature as noted. <sup>13</sup>C NMR spectra were recorded at 125 or 150 MHz. Electrospray-ionization mass spectra were recorded on an Agilent Technologies 6220 TOF instrument. All compounds were synthesized following reported protocols.<sup>1</sup>

To determine the purity of all tested compounds, samples were analyzed using HPLC (Waters® XTerra® RP C18 analytical column), particle size: 3.5µm, column dimensions: 4.8\*150 mm. A gradient elution was used following the program given in **Table SII**. Solvent A was 0.05% trifluoroacetic acid in milliQ water, and solvent B was acetonitrile.

**Table SI1: HPLC Gradient elution program for testing compound purity.**

| Step | Time | Flow rate | % A | % B |
|------|------|-----------|-----|-----|
| 1    | -    | 0.8       | 100 | 0   |
| 2    | 4    | 0.8       | 100 | 0   |
| 3    | 8    | 0.8       | 35  | 65  |
| 4    | 16   | 0.8       | 35  | 65  |
| 5    | 17   | 0.8       | 0   | 100 |
| 6    | 20   | 0.8       | 0   | 100 |
| 7    | 24   | 0.8       | 100 | 0   |
| 8    | 25   | 0         | -   | -   |

The compounds were detected using a Waters 2996 photodiode array detector. The traces below (**Figure SI1**) show response at 254 nm.

**Table SI2: HPLC and HRMS results for compounds (1-11).**

To confirm the identity of the all tested compounds, samples were submitted for high resolution mass spectrometry (HRMS). The results of HPLC and HRMS are summarized in **Table SI2**. HPLC traces and mass spectra are shown in **Figure SI1** and **Figure SI2**, respectively.

| Compound Number | HPLC trace           |        | HRMS (M-H) <sup>+</sup> |           |
|-----------------|----------------------|--------|-------------------------|-----------|
|                 | Retention Time (min) | % Area | Calculated M/z          | Found M/z |
| DANA (1)        | 2.545                | 99.53  | 290.0881                | 290.0887  |
| 2               | 3.947                | 99.62  | 315.0946                | 315.0954  |
| 3               | 13.809               | 95.51  | 417.1416                | 417.1421  |
| 4               | 2.529                | 95.55  | 385.1365                | 385.1363  |
| 5               | 13.979               | 97.40  | 447.1521                | 447.1527  |
| 6               | 5.507                | 99.52  | 371.1208                | 371.1208  |
| 7               | 4.754                | 96.78  | 385.1365                | 385.1362  |
| 8               | 9.744                | 95.04  | 399.1521                | 399.1518  |
| 9               | 1.943                | 100    | 399.1521                | 399.1517  |
| 10              | 3.403                | 98.23  | 331.0895                | 331.0893  |
| 11              | 13.636               | 100    | 433.1365                | 433.1366  |

The IC<sub>50</sub> curves for all the tested compounds (**1-11**) with the human neuraminidases (NEU1, NEU2, NEU3 and NEU4) are shown in **Figure SI3**. We also measured the inhibition constant (K<sub>i</sub>) for **6** and **7** with their target enzyme NEU4 (**Figure SI4**). For each inhibitor, the double reciprocal curve (1/product formation rate versus 1/[S]) for several inhibitor concentrations were plotted and fit by linear regression. The slopes of these lines were plotted versus inhibitor concentration and fit to a standard equation ( $y = ax+b$ ). K<sub>i</sub> was given by  $-b/a$  and the error was calculated from the linear fit.

**Figure SI1: HPLC traces of the tested compounds (1-11).**

a- HPLC trace of DANA (1)

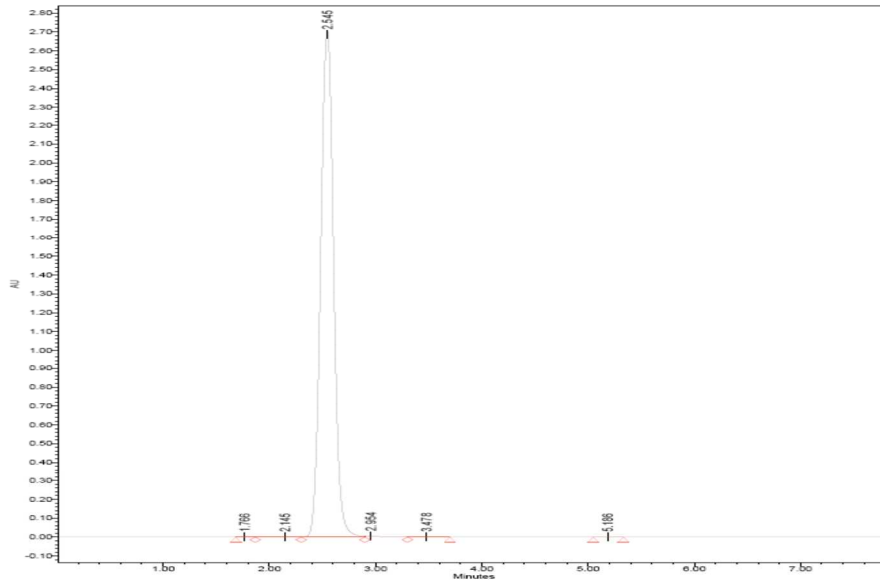

|          | <b>Retention Time (min)</b> | <b>Area (<math>\mu\text{V}\cdot\text{sec}</math>)</b> | <b>%Area</b> | <b>Hight (<math>\mu\text{V}</math>)</b> | <b>Int. Type</b> |
|----------|-----------------------------|-------------------------------------------------------|--------------|-----------------------------------------|------------------|
| <b>1</b> | 1.766                       | 1434                                                  | 0.01         | 240                                     | BV               |
| <b>2</b> | 2.145                       | 15441                                                 | 0.07         | 1041                                    | VV               |
| <b>3</b> | 2.545                       | 22972011                                              | 99.53        | 2711004                                 | VV               |
| <b>4</b> | 2.954                       | 65053                                                 | 0.28         | 5414                                    | VV               |
| <b>5</b> | 3.478                       | 22964                                                 | 0.10         | 1717                                    | VB               |
| <b>6</b> | 5.188                       | 3343                                                  | 0.01         | 393                                     | BB               |

b- HPLC trace of 2

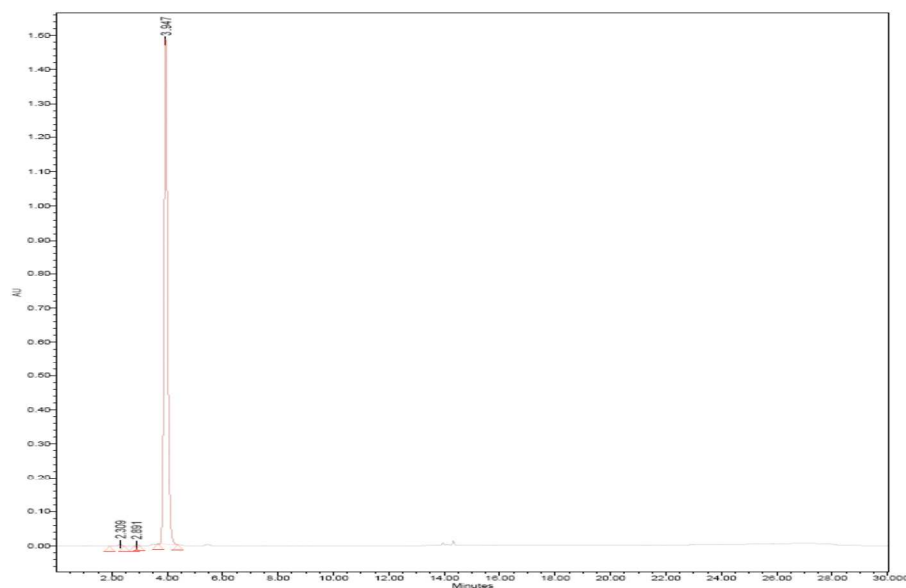

|          | <b>Retention Time (min)</b> | <b>Area (μV*sec)</b> | <b>%Area</b> | <b>Hight (μV)</b> | <b>Int. Type</b> |
|----------|-----------------------------|----------------------|--------------|-------------------|------------------|
| <b>1</b> | 2.309                       | 39733                | 0.29         | 5074              | BB               |
| <b>2</b> | 2.891                       | 11637                | 0.09         | 2223              | BB               |
| <b>3</b> | 3.947                       | 13551725             | 99.62        | 1484883           | BB               |

c- HPLC trace of 3

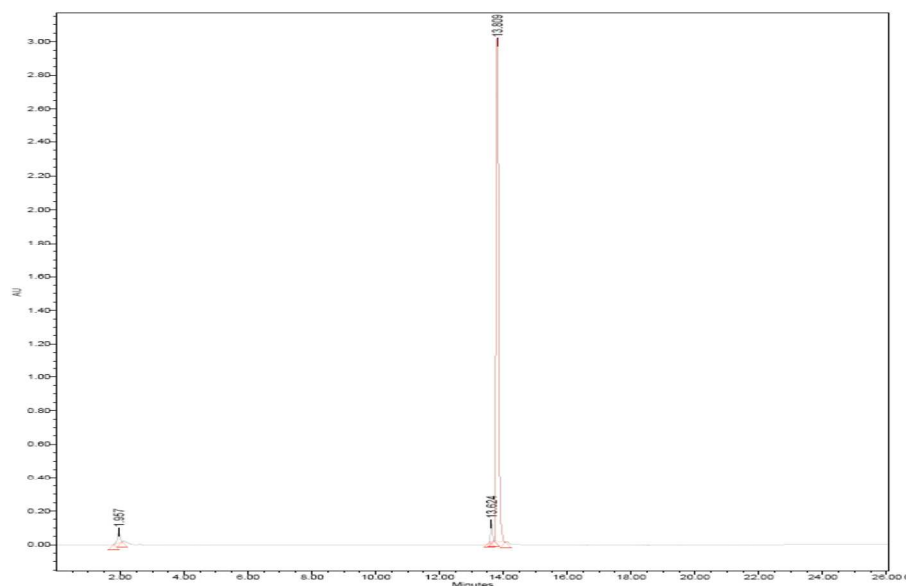

|          | <b>Retention Time (min)</b> | <b>Area (μV*sec)</b> | <b>%Area</b> | <b>Hight (μV)</b> | <b>Int. Type</b> |
|----------|-----------------------------|----------------------|--------------|-------------------|------------------|
| <b>1</b> | 1.957                       | 393536               | 2.12         | 64682             | BB               |
| <b>2</b> | 13.624                      | 439705               | 2.37         | 106983            | BB               |
| <b>3</b> | 13.809                      | 17722666             | 95.51        | 3119332           | BB               |

d- HPLC trace of 4

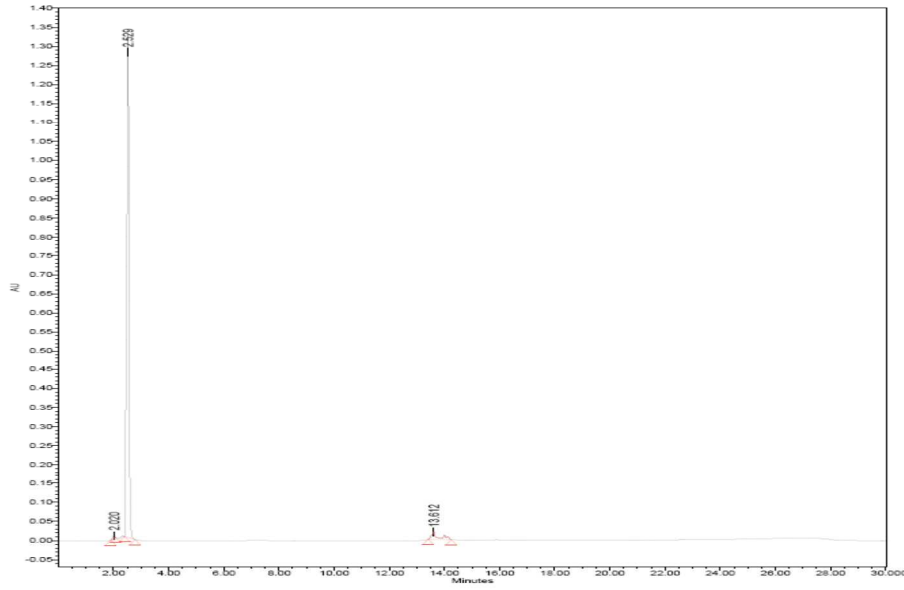

|          | <b>Retention Time (min)</b> | <b>Area (μV*sec)</b> | <b>%Area</b> | <b>Hight (μV)</b> | <b>Int. Type</b> |
|----------|-----------------------------|----------------------|--------------|-------------------|------------------|
| <b>1</b> | 2.020                       | 27419                | 0.34         | 5789              | BB               |
| <b>2</b> | 2.529                       | 7623335              | 95.55        | 1267933           | BB               |
| <b>3</b> | 13.612                      | 327262               | 4.10         | 19026             | BB               |

e- HPLC trace of 5

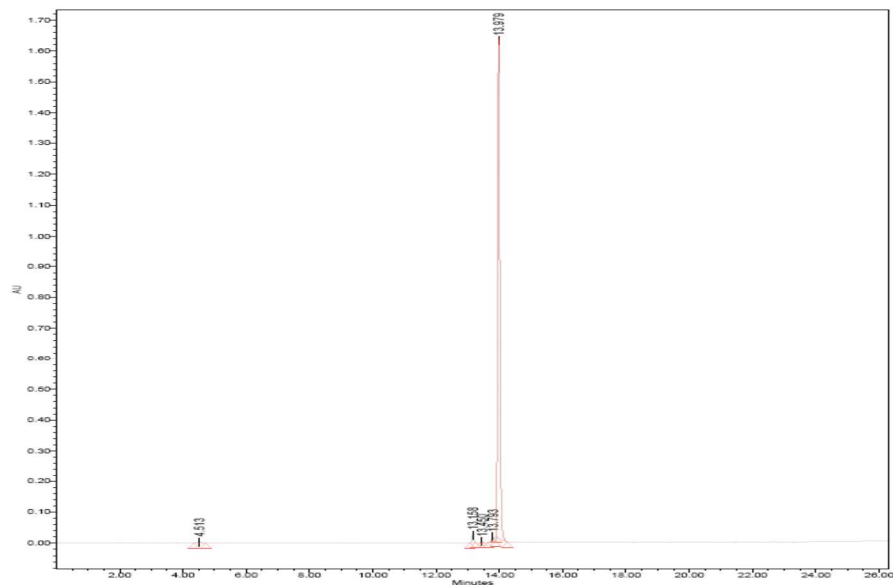

|   | Retention Time (min) | Area ( $\mu\text{V}\cdot\text{sec}$ ) | %Area | Hight ( $\mu\text{V}$ ) | Int. Type |
|---|----------------------|---------------------------------------|-------|-------------------------|-----------|
| 1 | 4.513                | 33200                                 | 0.42  | 3401                    | BB        |
| 2 | 13.158               | 92336                                 | 1.16  | 24174                   | BB        |
| 3 | 13.450               | 7984                                  | 0.10  | 2183                    | BB        |
| 4 | 13.793               | 73418                                 | 0.92  | 14344                   | BB        |
| 5 | 13.979               | 7755670                               | 97.40 | 1618956                 | BB        |



f- HPLC trace of 6

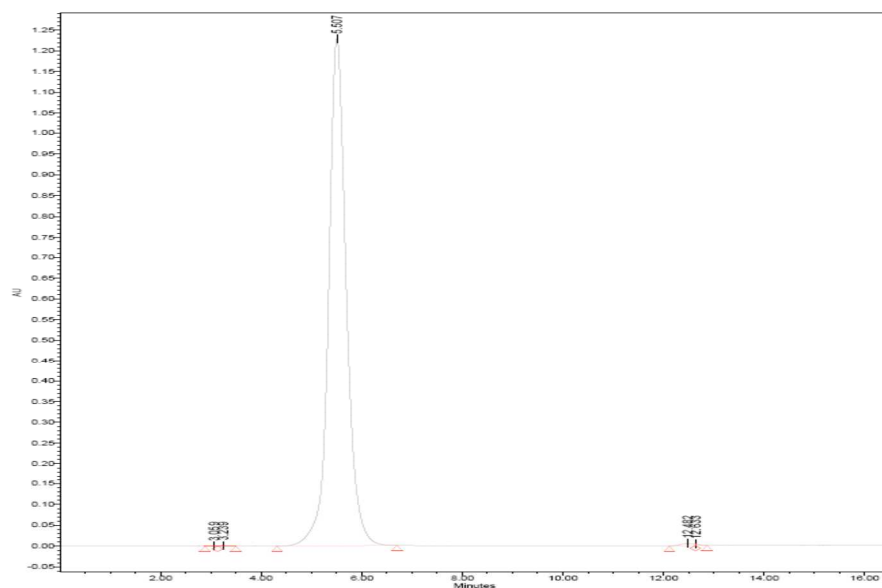

|          | <b>Retention Time (min)</b> | <b>Area (μV*sec)</b> | <b>%Area</b> | <b>Hight (μV)</b> | <b>Int. Type</b> |
|----------|-----------------------------|----------------------|--------------|-------------------|------------------|
| <b>1</b> | 3.059                       | 6678                 | 0.02         | 744               | BV               |
| <b>2</b> | 3.239                       | 17092                | 0.06         | 1524              | VB               |
| <b>3</b> | 5.507                       | 30162534             | 99.52        | 1229252           | BB               |
| <b>4</b> | 12.482                      | 103272               | 0.34         | 5997              | BV               |
| <b>5</b> | 12.633                      | 19365                | 0.06         | 4086              | VB               |

g- HPLC trace of 7

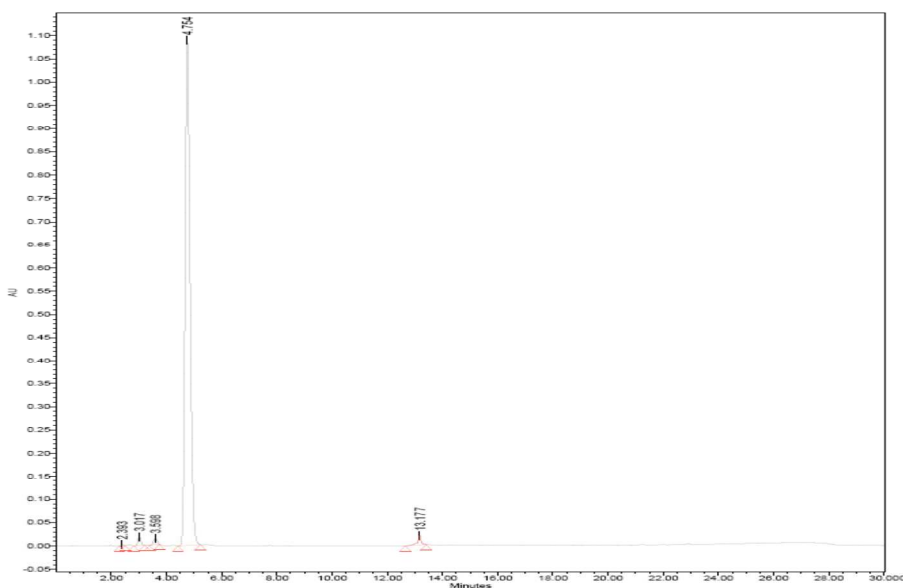

|          | <b>Retention Time (min)</b> | <b>Area (μV*sec)</b> | <b>%Area</b> | <b>Hight (μV)</b> | <b>Int. Type</b> |
|----------|-----------------------------|----------------------|--------------|-------------------|------------------|
| <b>1</b> | 2.393                       | 13191                | 0.09         | 2574              | BB               |
| <b>2</b> | 3.017                       | 138138               | 0.99         | 18289             | BB               |
| <b>3</b> | 3.598                       | 124768               | 0.89         | 13230             | BB               |
| <b>4</b> | 4.754                       | 13533015             | 96.78        | 1093283           | BB               |
| <b>5</b> | 13.177                      | 173816               | 1.24         | 20052             | BB               |

h- HPLC trace of 8

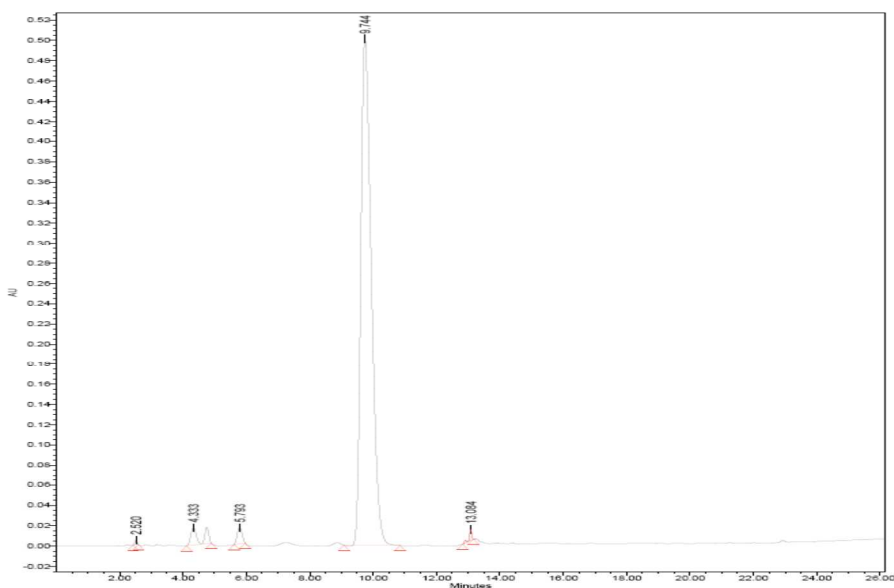

|          | <b>Retention Time (min)</b> | <b>Area (μV*sec)</b> | <b>%Area</b> | <b>Hight (μV)</b> | <b>Int. Type</b> |
|----------|-----------------------------|----------------------|--------------|-------------------|------------------|
| <b>1</b> | 2.520                       | 24032                | 0.20         | 4554              | BB               |
| <b>2</b> | 4.333                       | 347679               | 2.90         | 16945             | BB               |
| <b>3</b> | 5.793                       | 171629               | 1.34         | 15768             | BB               |
| <b>4</b> | 9.744                       | 11404544             | 95.04        | 501348            | BB               |
| <b>5</b> | 13.084                      | 52279                | 0.44         | 10488             | BB               |

i- HPLC trace of 9

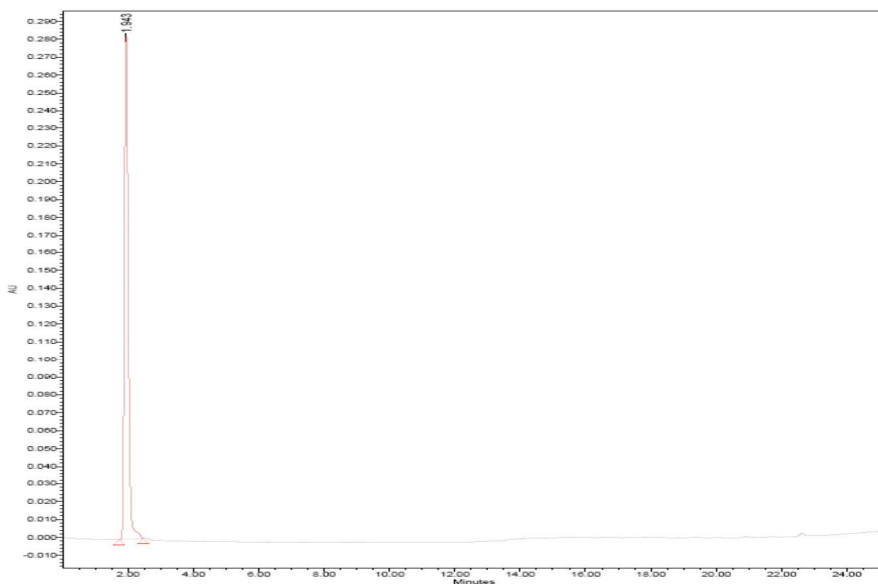

|          | <b>Retention Time (min)</b> | <b>Area (<math>\mu\text{V}\cdot\text{sec}</math>)</b> | <b>%Area</b> | <b>Hight (<math>\mu\text{V}</math>)</b> | <b>Int. Type</b> |
|----------|-----------------------------|-------------------------------------------------------|--------------|-----------------------------------------|------------------|
| <b>1</b> | 1.943                       | 2290792                                               | 100.00       | 283664                                  | BB               |

j- HPLC trace of 10

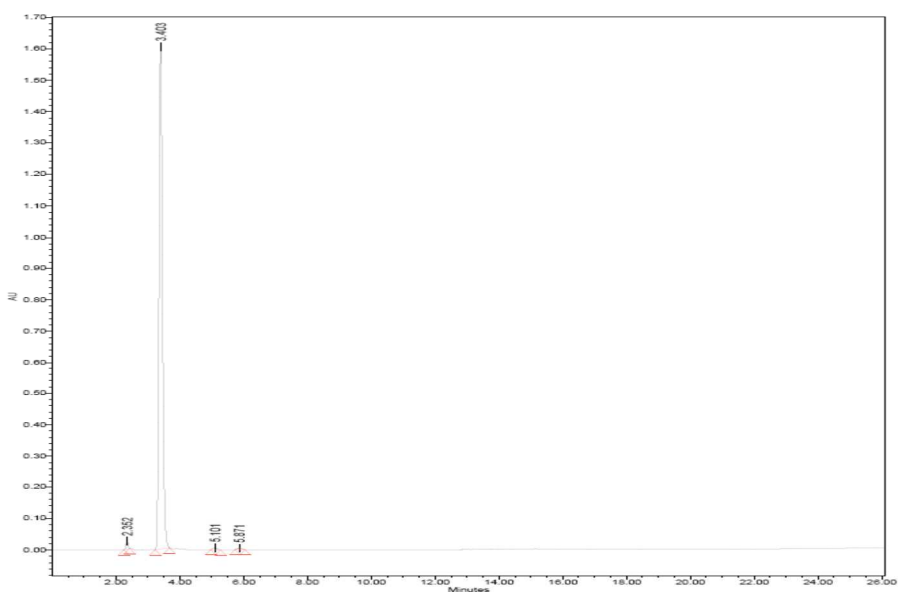

|          | <b>Retention Time (min)</b> | <b>Area (<math>\mu\text{V}\cdot\text{sec}</math>)</b> | <b>%Area</b> | <b>Hight (<math>\mu\text{V}</math>)</b> | <b>Int. Type</b> |
|----------|-----------------------------|-------------------------------------------------------|--------------|-----------------------------------------|------------------|
| <b>1</b> | 2.352                       | 111889                                                | 0.92         | 24986                                   | BB               |
| <b>2</b> | 3.403                       | 11934962                                              | 98.23        | 1614598                                 | BB               |
| <b>3</b> | 5.101                       | 56756                                                 | 0.47         | 6185                                    | BB               |
| <b>4</b> | 5.871                       | 45875                                                 | 0.38         | 4516                                    | BB               |

k- HPLC trace of 11

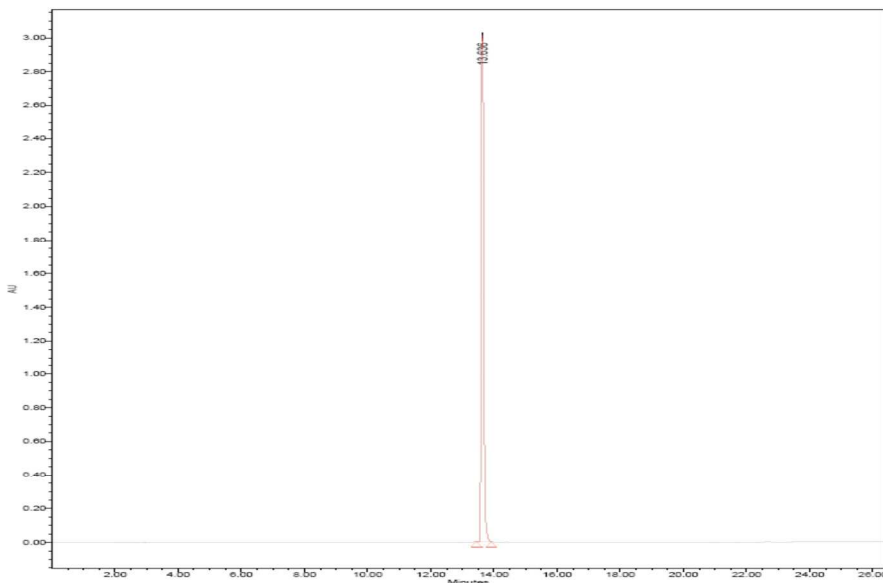

|          | <b>Retention Time (min)</b> | <b>Area (<math>\mu\text{V}\cdot\text{sec}</math>)</b> | <b>%Area</b> | <b>Hight (<math>\mu\text{V}</math>)</b> | <b>Int. Type</b> |
|----------|-----------------------------|-------------------------------------------------------|--------------|-----------------------------------------|------------------|
| <b>1</b> | 13.636                      | 16618000                                              | 100.00       | 3107171                                 | BB               |

**Figure SI2: HRMS spectra of the tested compounds (1-11).**

a- HRMS of **2**: (M-H)<sup>-</sup> found 315.0954, calculated 315.0946

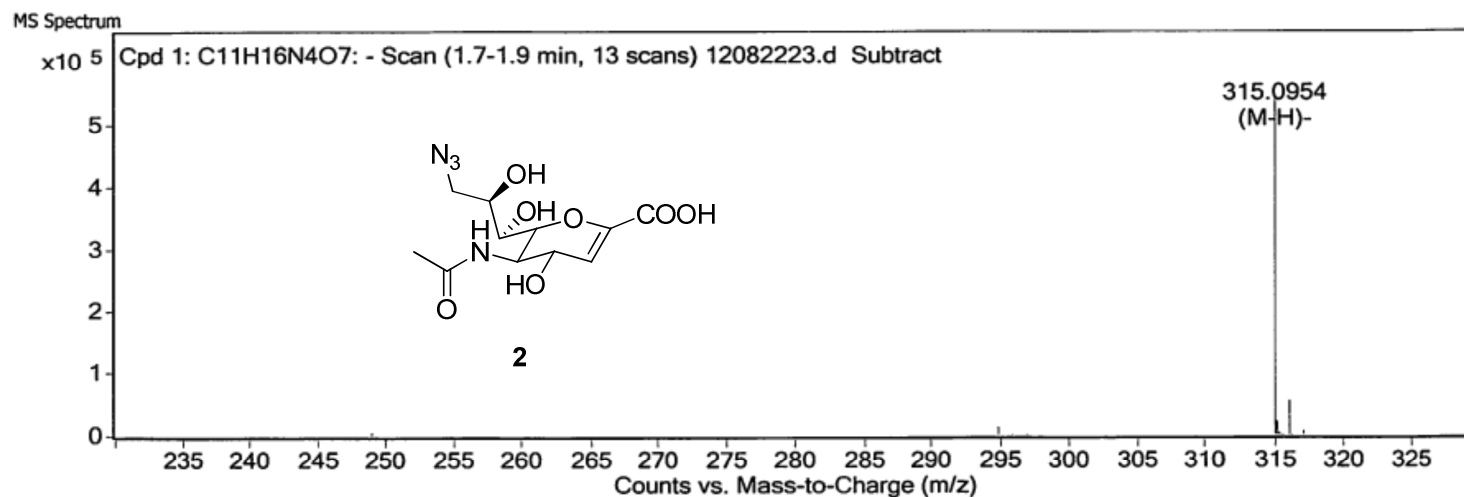

**MS Spectrum Peak List**

| <i>m/z</i> | <i>Calc m/z</i> | <i>Diff(ppm)</i> | <i>Abund</i> | <i>Formula</i>                                                | <i>Ion</i>         |
|------------|-----------------|------------------|--------------|---------------------------------------------------------------|--------------------|
| 315.0954   | 315.0946        | 2.41             | 544510       | C <sub>11</sub> H <sub>15</sub> N <sub>4</sub> O <sub>7</sub> | (M-H) <sup>-</sup> |

b- HRMS of **3**: (M-H)<sup>-</sup> found 417.1421, calculated 417.1416

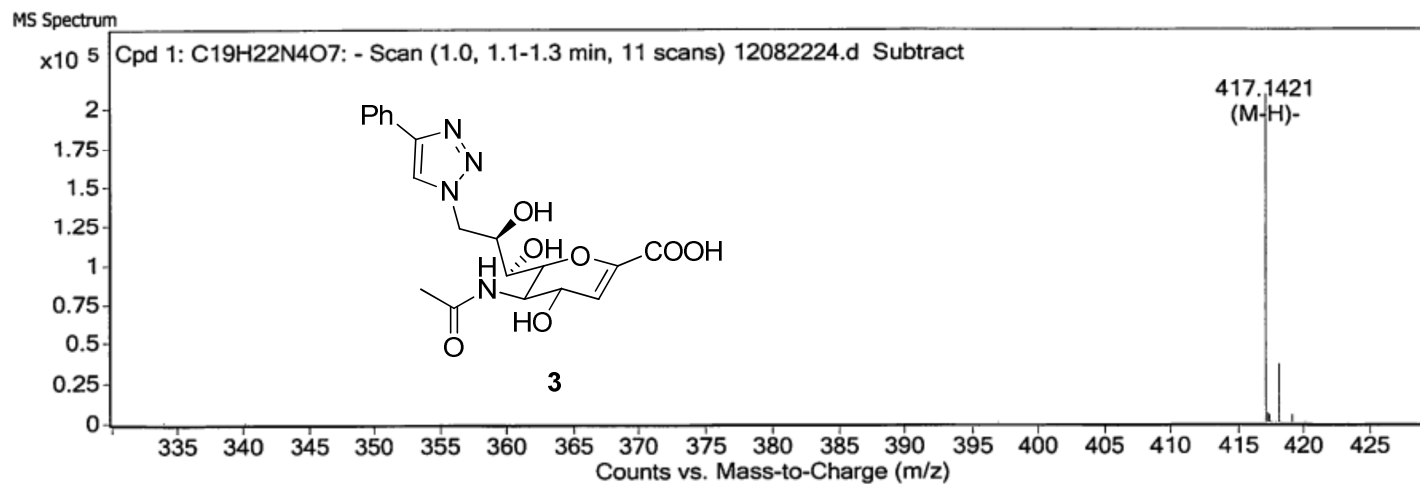

MS Spectrum Peak List

| m/z      | Calc m/z | Diff(ppm) | z | Abund  | Formula                                                       | Ion                |
|----------|----------|-----------|---|--------|---------------------------------------------------------------|--------------------|
| 417.1421 | 417.1416 | 1.16      | 1 | 209037 | C <sub>19</sub> H <sub>21</sub> N <sub>4</sub> O <sub>7</sub> | (M-H) <sup>-</sup> |



c- HRMS of **4**: (M-H)<sup>-</sup> found 385.1363, calculated 385.1365

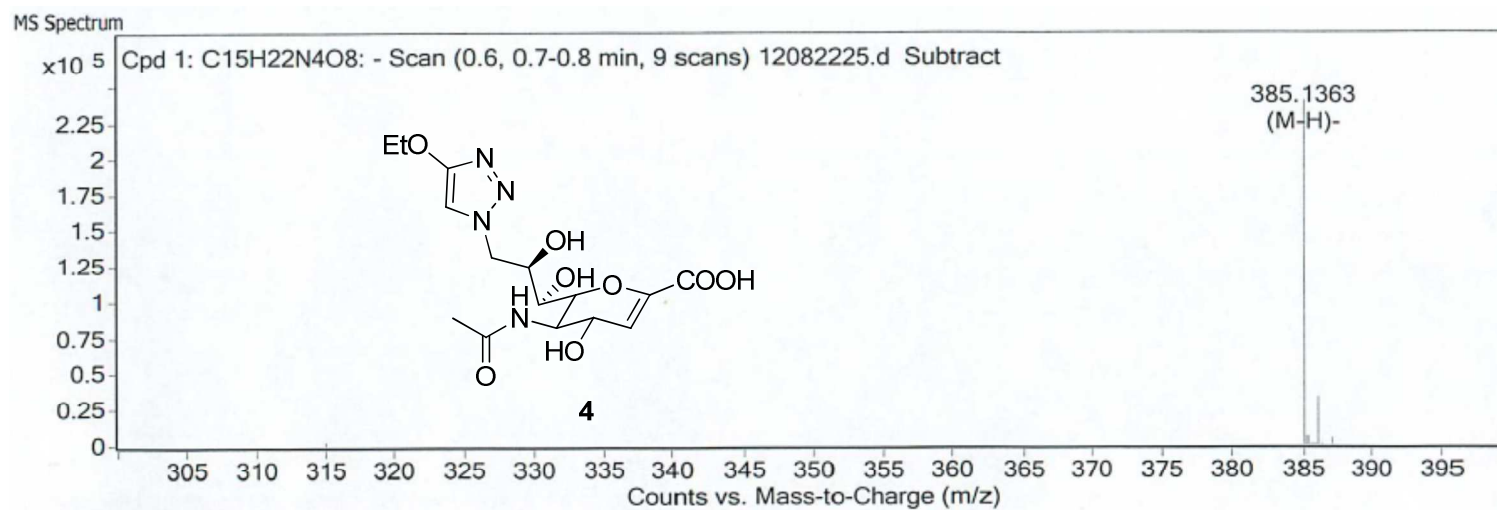

MS Spectrum Peak List

| <i>m/z</i> | <i>Calc m/z</i> | Diff(ppm) | Abund  | Formula                                                       | Ion                |
|------------|-----------------|-----------|--------|---------------------------------------------------------------|--------------------|
| 385.1363   | 385.1365        | -0.44     | 240633 | C <sub>15</sub> H <sub>21</sub> N <sub>4</sub> O <sub>8</sub> | (M-H) <sup>-</sup> |

d- HRMS of **5**: (M-H)<sup>-</sup> found 447.1527, calculated 447.1521

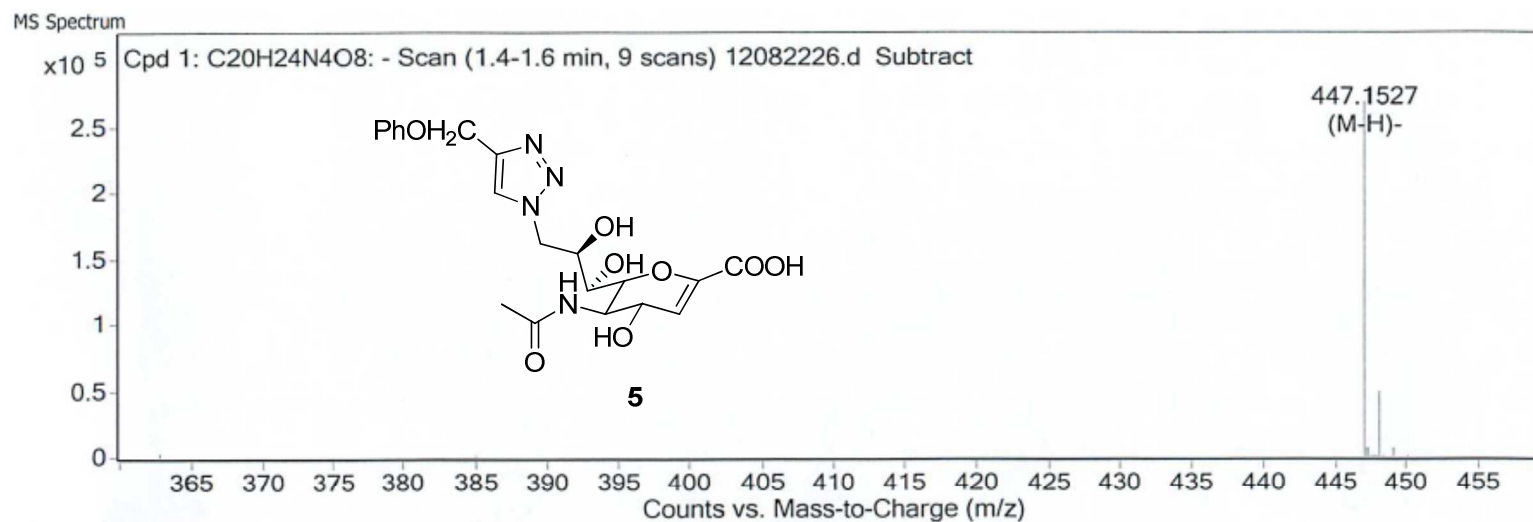

MS Spectrum Peak List

| <i>m/z</i> | <i>Calc m/z</i> | Diff(ppm) | Abund  | Formula                                                       | Ion                |
|------------|-----------------|-----------|--------|---------------------------------------------------------------|--------------------|
| 447.1527   | 447.1521        | 1.18      | 269017 | C <sub>20</sub> H <sub>23</sub> N <sub>4</sub> O <sub>8</sub> | (M-H) <sup>-</sup> |

e- HRMS of **6**: (M-H)<sup>-</sup> found 371.1208, calculated 371.1208

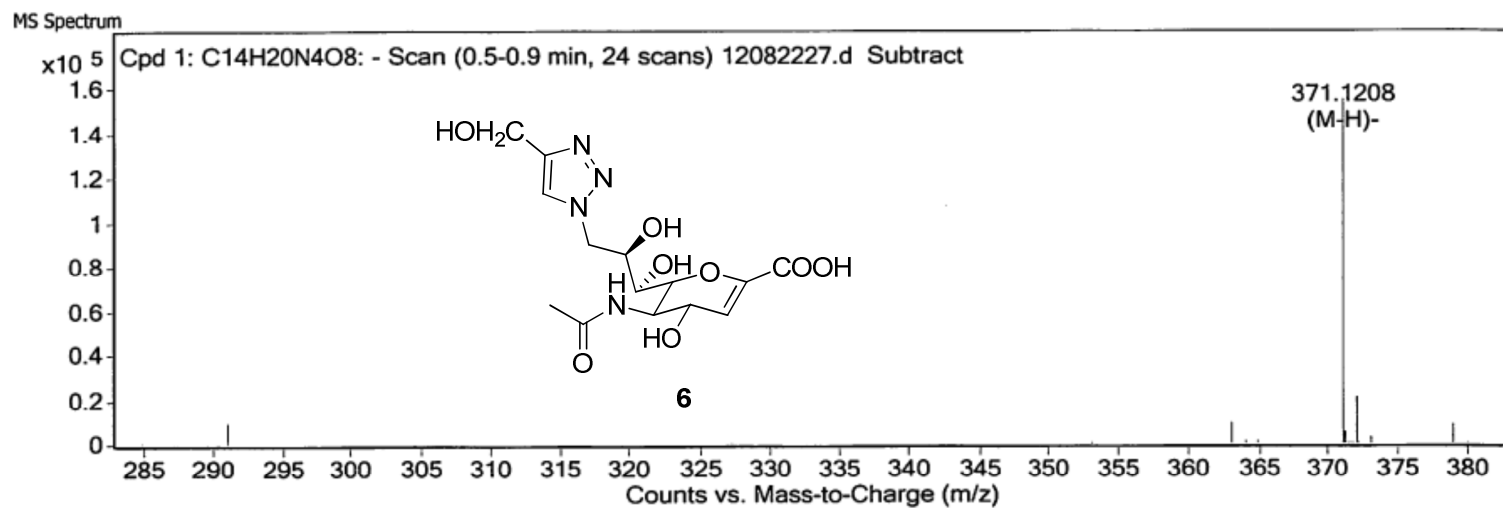

MS Spectrum Peak List

| <i>m/z</i> | <i>Calc m/z</i> | Diff(ppm) | <i>z</i> | Abund  | Formula                                                       | Ion                |
|------------|-----------------|-----------|----------|--------|---------------------------------------------------------------|--------------------|
| 371.1208   | 371.1208        | -0.17     | -1       | 155741 | C <sub>14</sub> H <sub>19</sub> N <sub>4</sub> O <sub>8</sub> | (M-H) <sup>-</sup> |

f- HRMS of 7: (M-H)<sup>-</sup> found 385.1362, calculated 385.1365

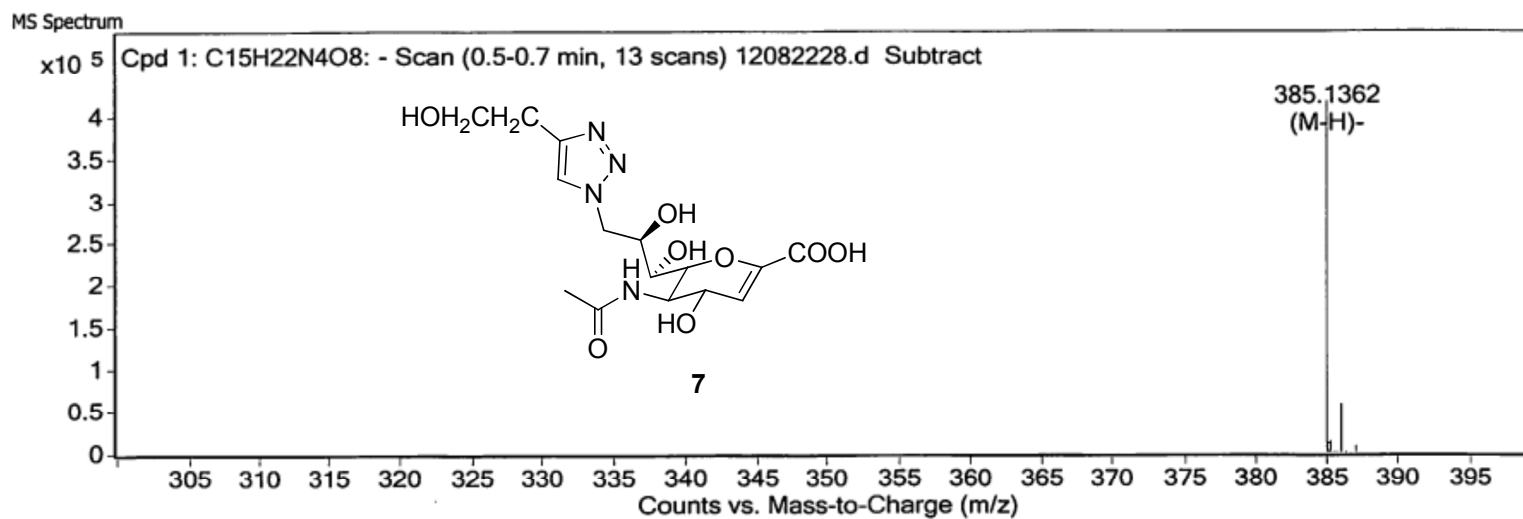

MS Spectrum Peak List

| <i>m/z</i> | <i>Calc m/z</i> | Diff(ppm) | Abund  | Formula                                                       | Ion                |
|------------|-----------------|-----------|--------|---------------------------------------------------------------|--------------------|
| 385.1362   | 385.1365        | -0.66     | 419004 | C <sub>15</sub> H <sub>21</sub> N <sub>4</sub> O <sub>8</sub> | (M-H) <sup>-</sup> |

g- HRMS of **8**: (M-H)<sup>-</sup> found 399.1518, calculated 399.1521

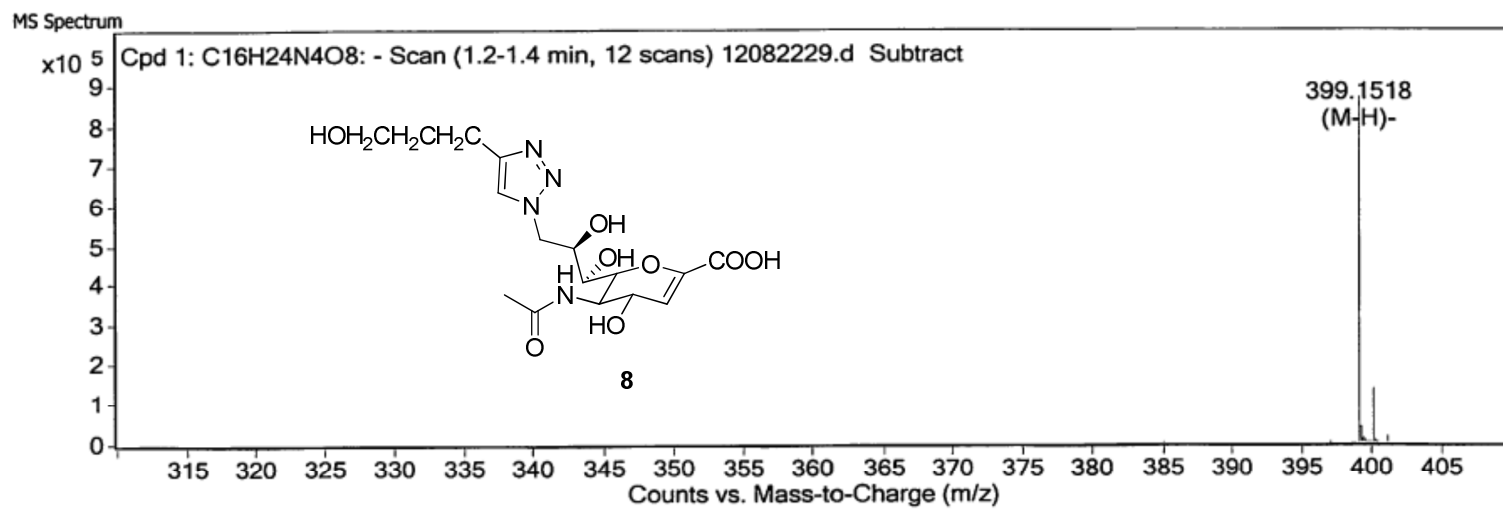

MS Spectrum Peak List

| <i>m/z</i> | <i>Calc m/z</i> | Diff(ppm) | Abund  | Formula                                                       | Ion                |
|------------|-----------------|-----------|--------|---------------------------------------------------------------|--------------------|
| 399.1518   | 399.1521        | -0.96     | 870595 | C <sub>16</sub> H <sub>23</sub> N <sub>4</sub> O <sub>8</sub> | (M-H) <sup>-</sup> |

h- HRMS of **9**: (M-H)<sup>-</sup> found 399.1517, calculated 399.1521

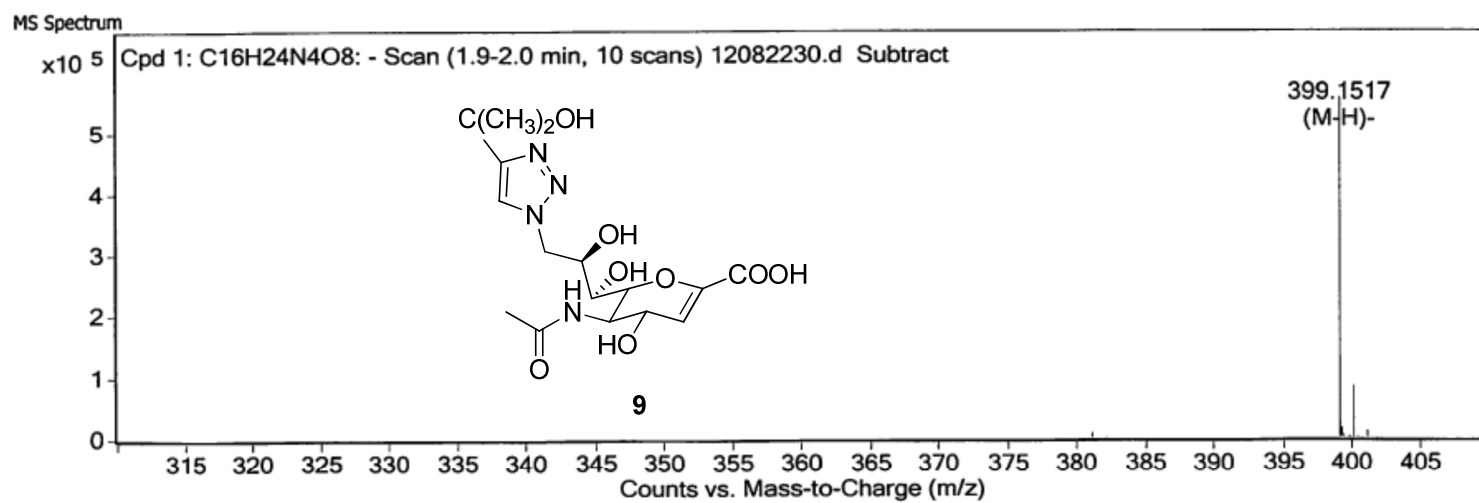

MS Spectrum Peak List

| m/z      | Calc m/z | Diff(ppm) | Abund  | Formula                                                       | Ion                |
|----------|----------|-----------|--------|---------------------------------------------------------------|--------------------|
| 399.1517 | 399.1521 | -1.13     | 555721 | C <sub>16</sub> H <sub>23</sub> N <sub>4</sub> O <sub>8</sub> | (M-H) <sup>-</sup> |

i- HRMS of **10**: (M-H)<sup>-</sup> found 331.0893, calculated 331.0895

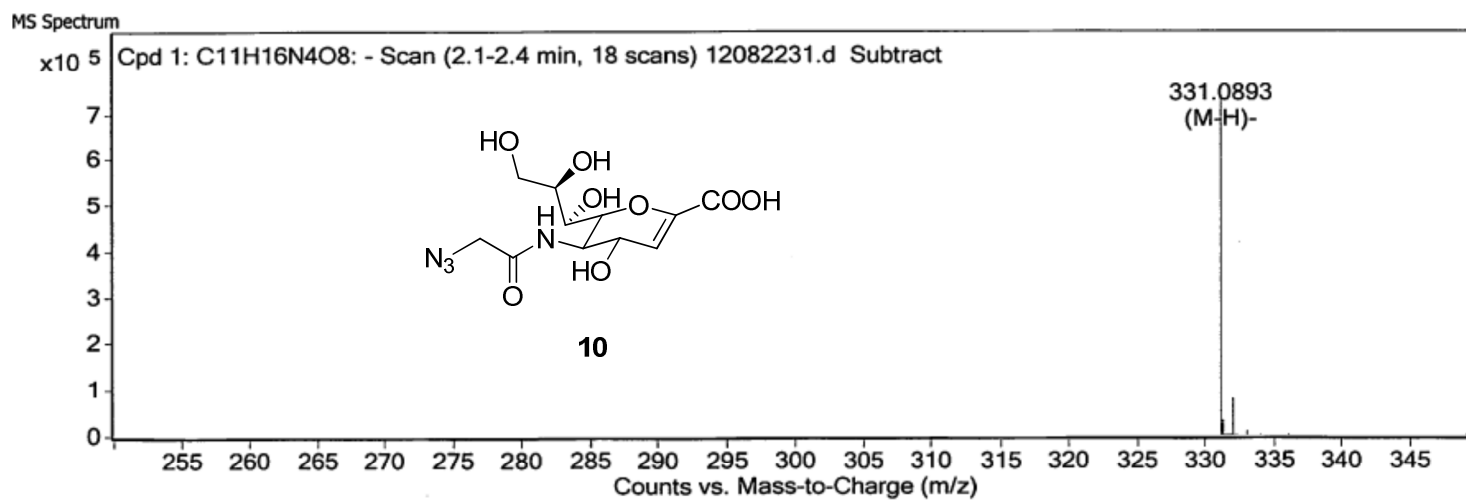

MS Spectrum Peak List

| m/z      | Calc m/z | Diff(ppm) | Abund  | Formula                                                       | Ion                |
|----------|----------|-----------|--------|---------------------------------------------------------------|--------------------|
| 331.0893 | 331.0895 | -0.64     | 734783 | C <sub>11</sub> H <sub>15</sub> N <sub>4</sub> O <sub>8</sub> | (M-H) <sup>-</sup> |

j- HRMS of **11**: (M-H)<sup>-</sup> found 433.1366, calculated 433.1365

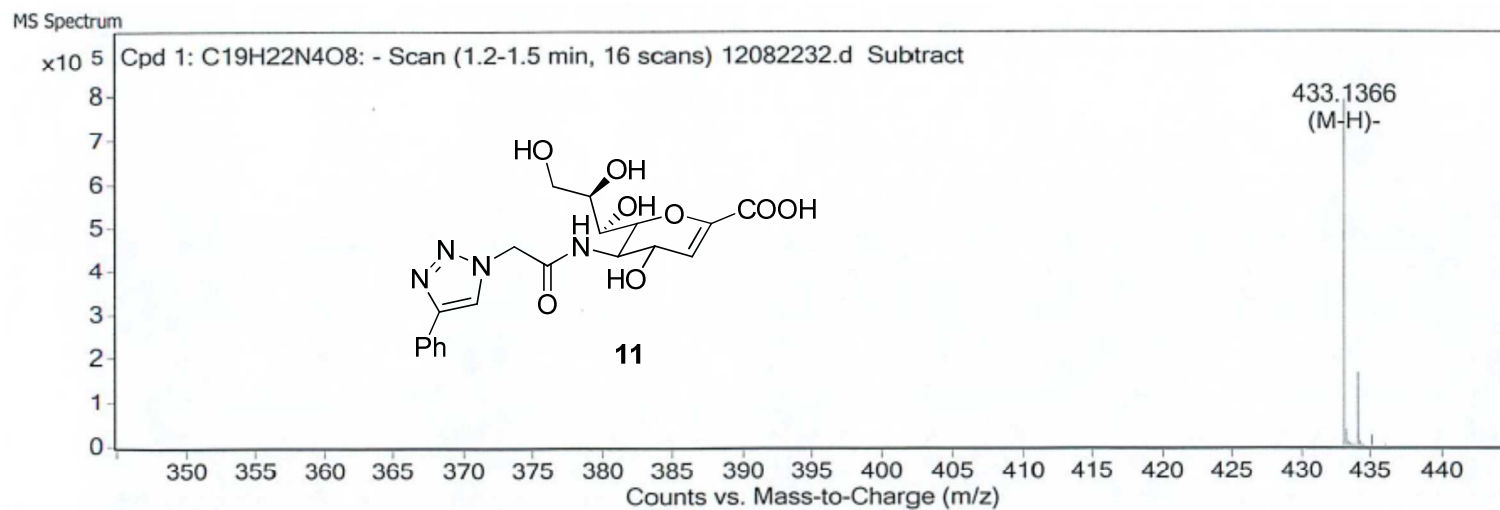

MS Spectrum Peak List

| m/z      | Calc m/z | Diff(ppm) | Abund  | Formula                                                       | Ion                |
|----------|----------|-----------|--------|---------------------------------------------------------------|--------------------|
| 433.1366 | 433.1365 | 0.36      | 793553 | C <sub>19</sub> H <sub>21</sub> N <sub>4</sub> O <sub>8</sub> | (M-H) <sup>-</sup> |



**Figure SI3: IC50 curves of compounds 1-11 with NEU1, NEU2, NEU3 and NEU4.**

a - IC<sub>50</sub> curves of compounds 1-11 with NEU1

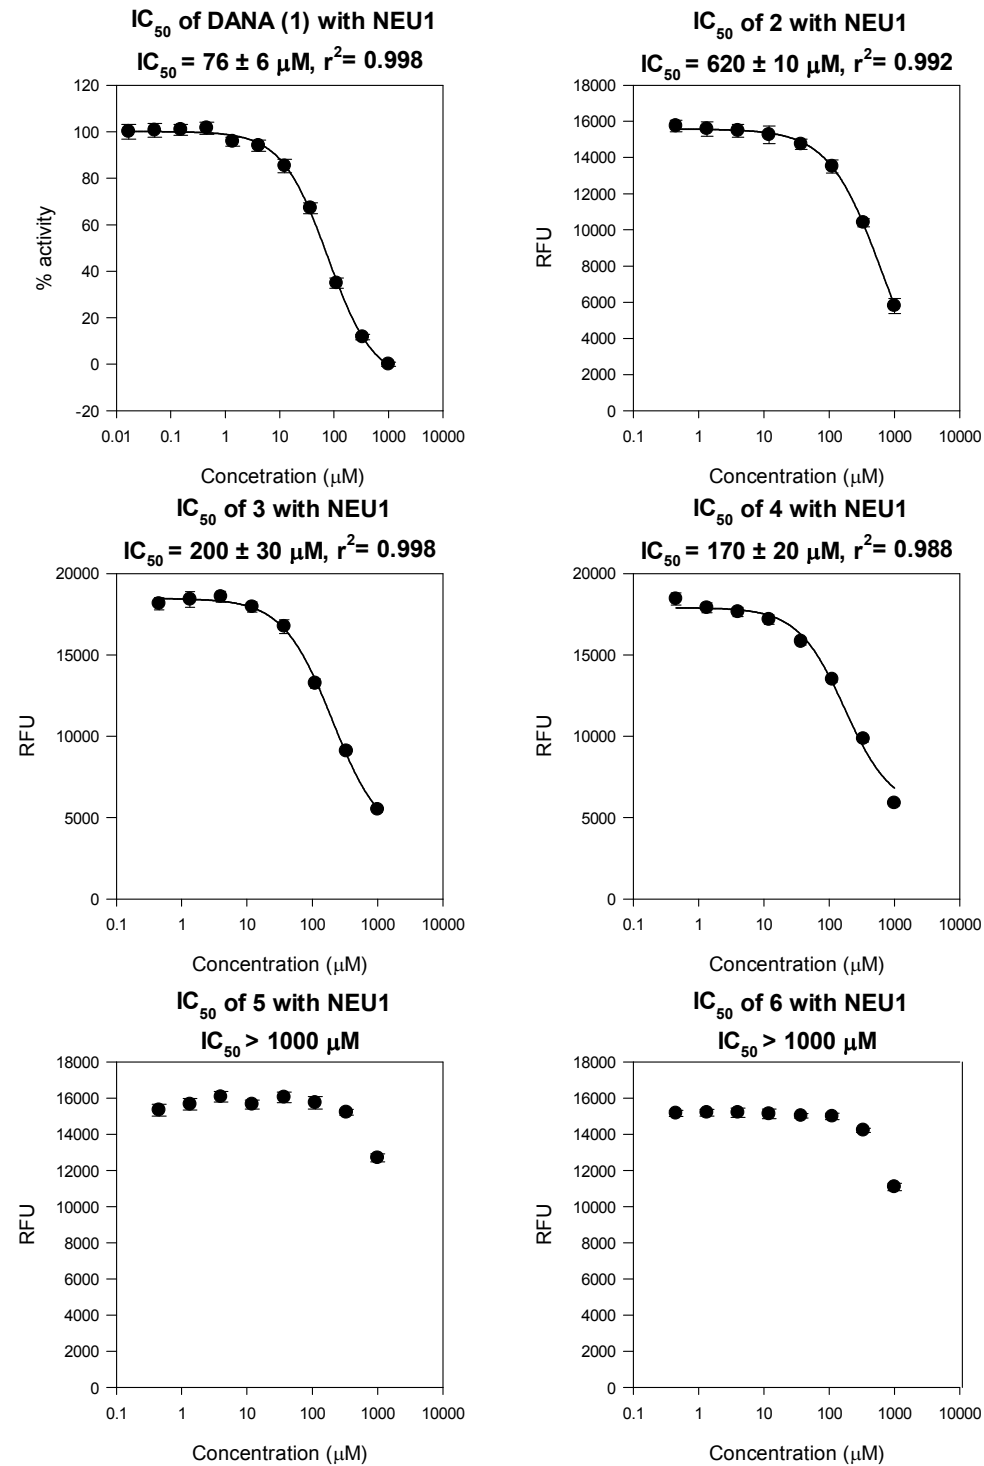

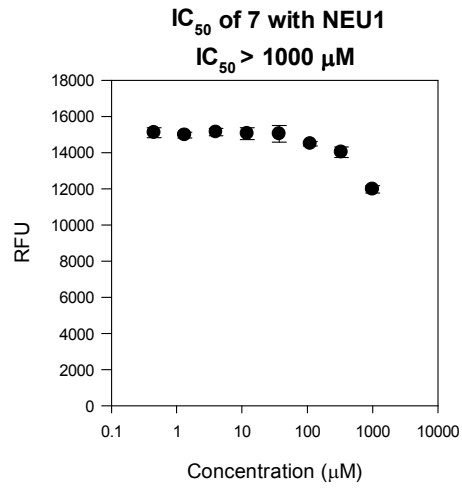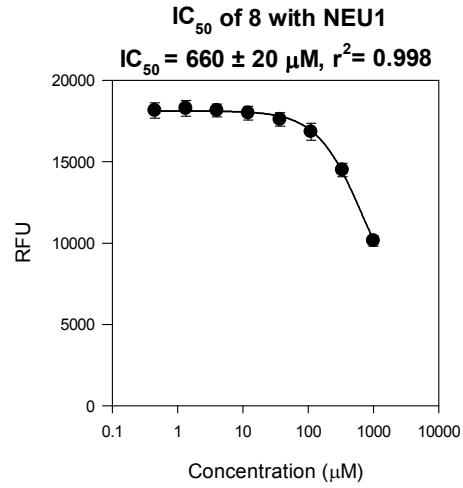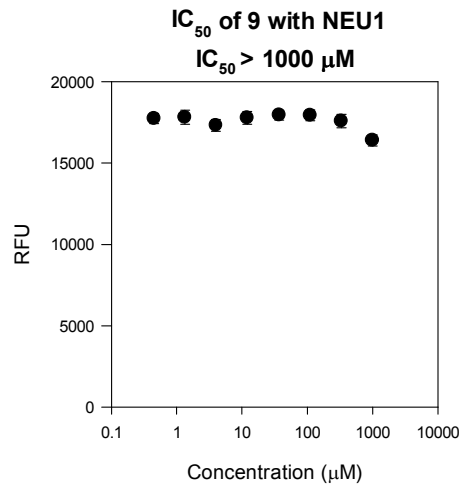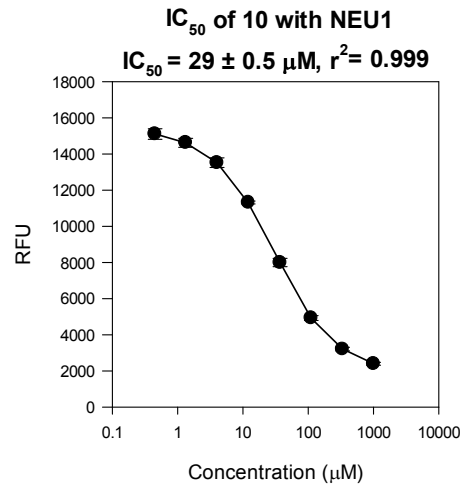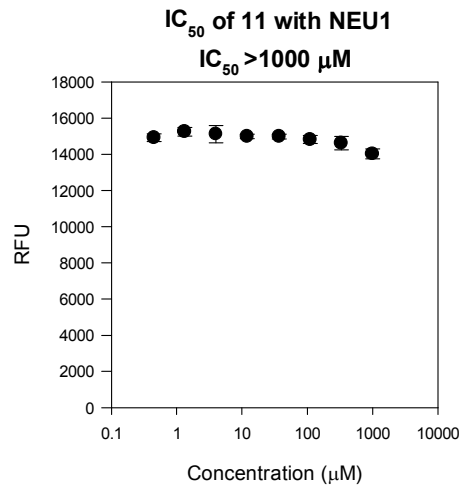

b - IC<sub>50</sub> curves of compounds 1-11 with NEU2

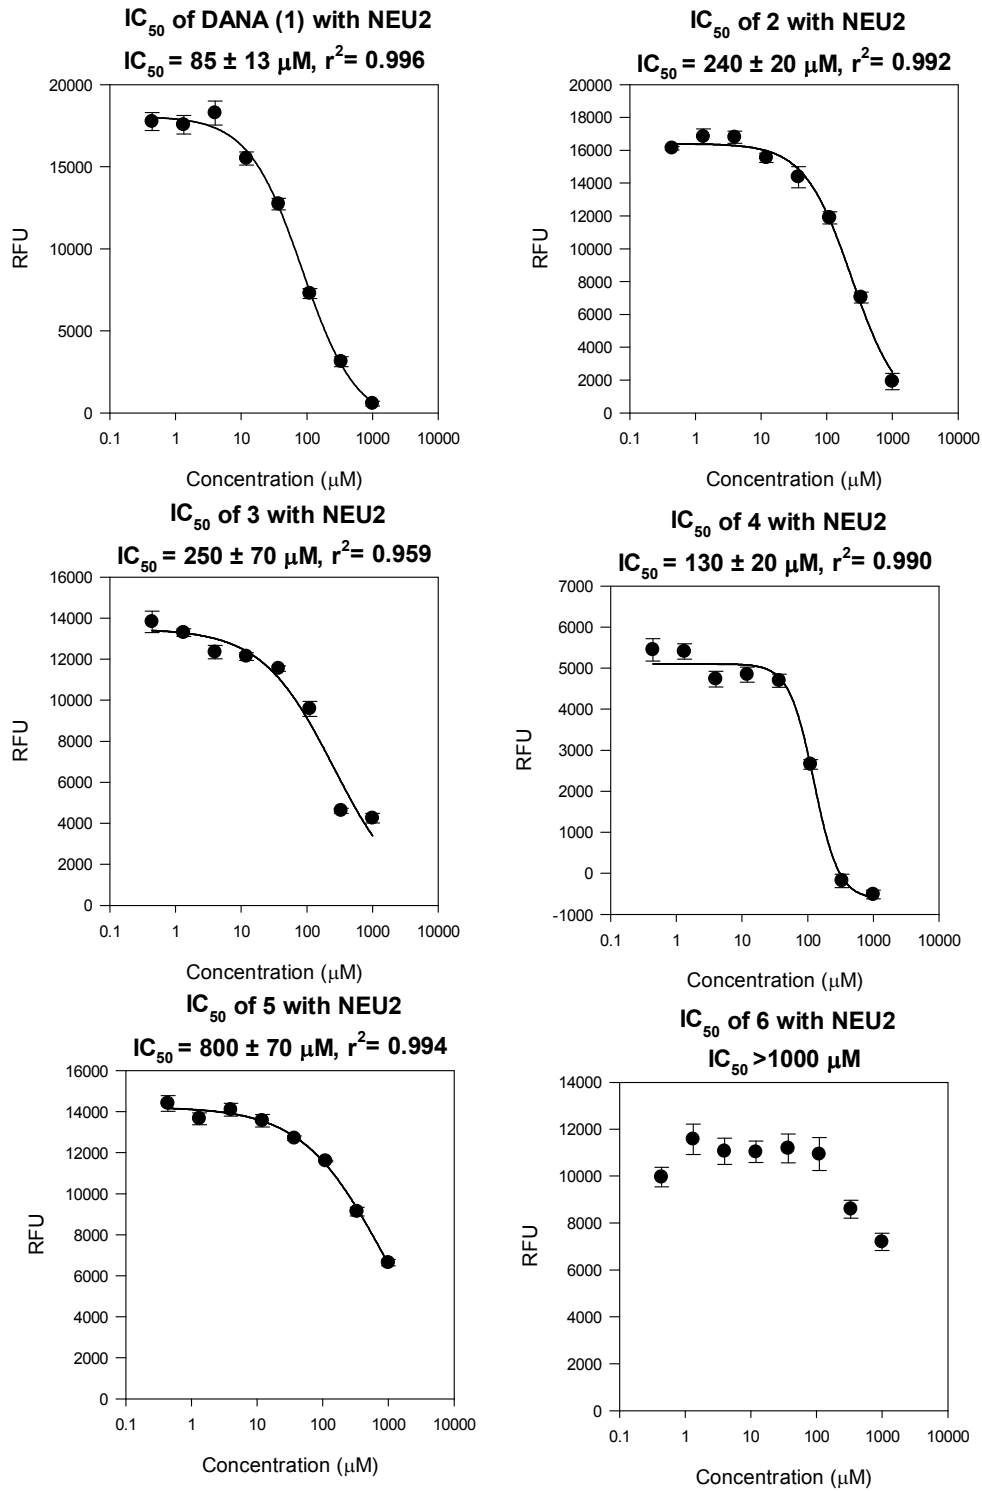

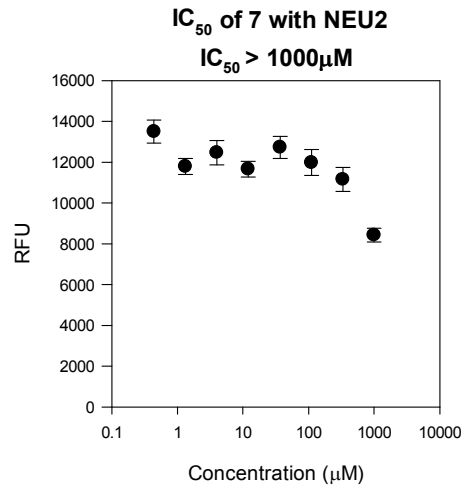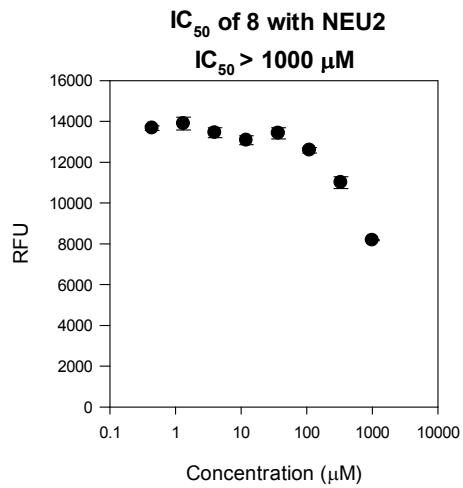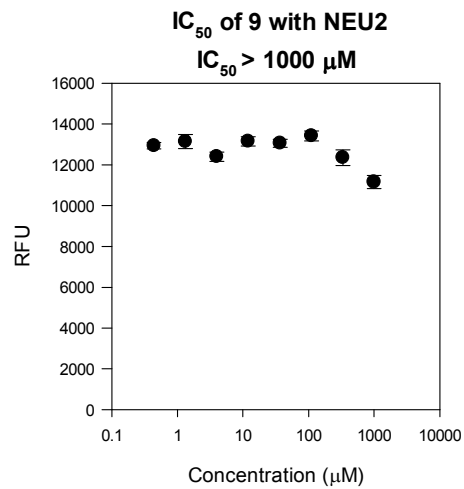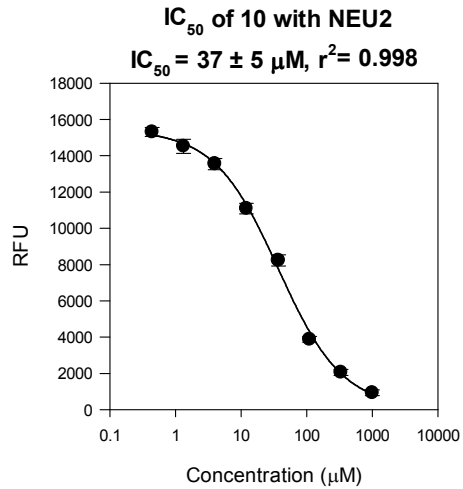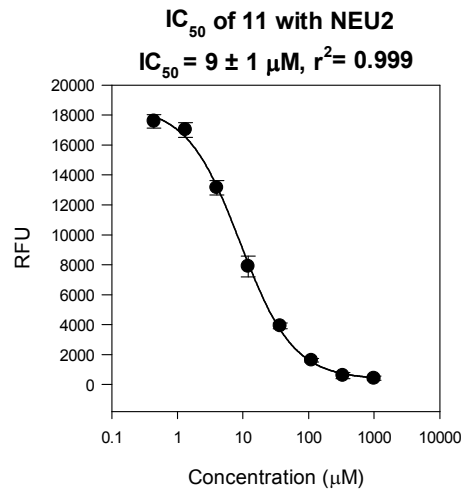

c - IC<sub>50</sub> curves of compounds 1-11 with NEU3

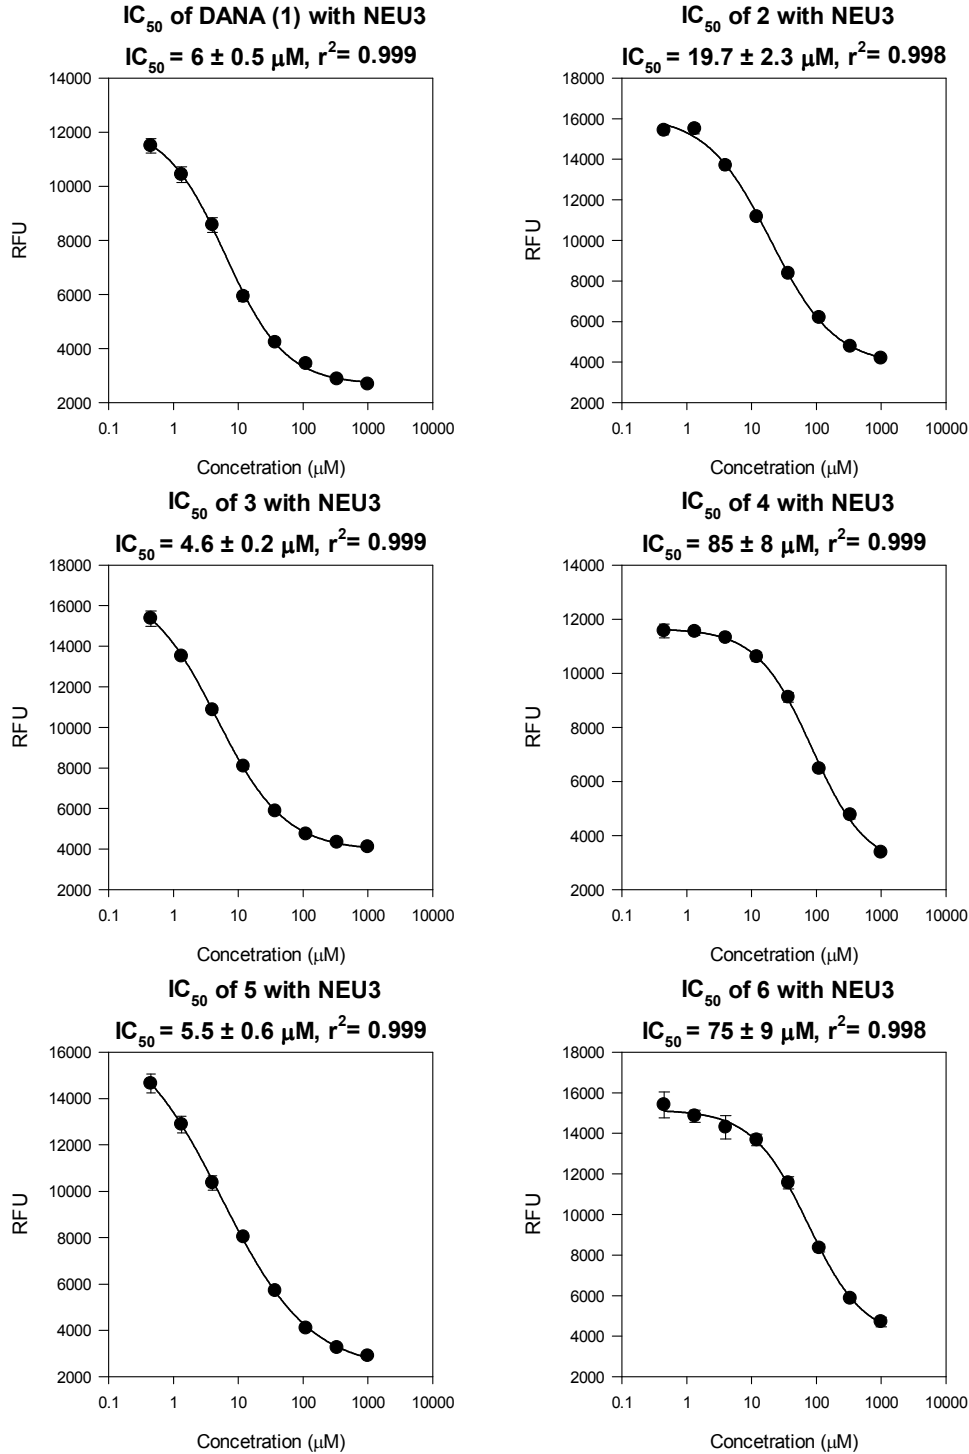

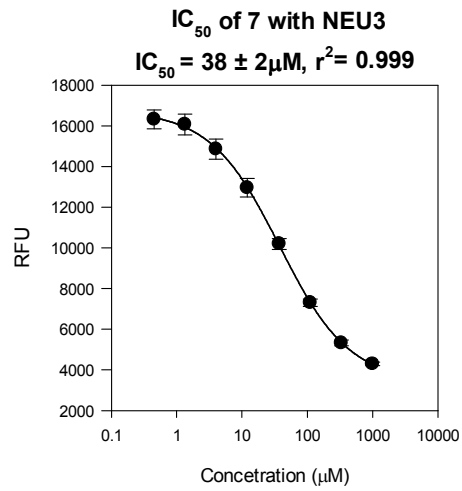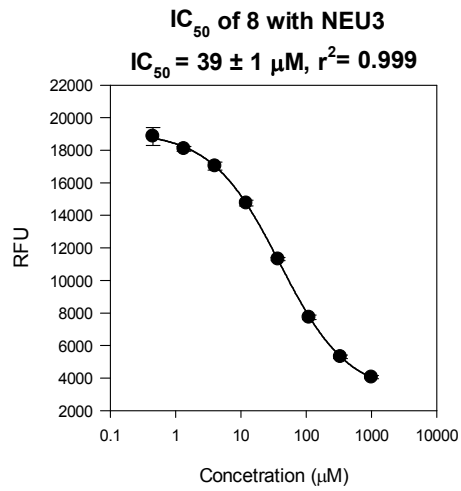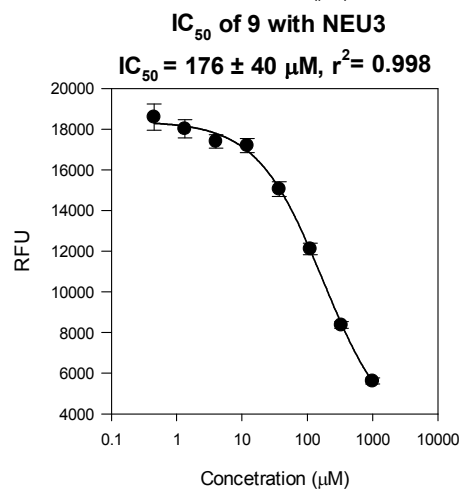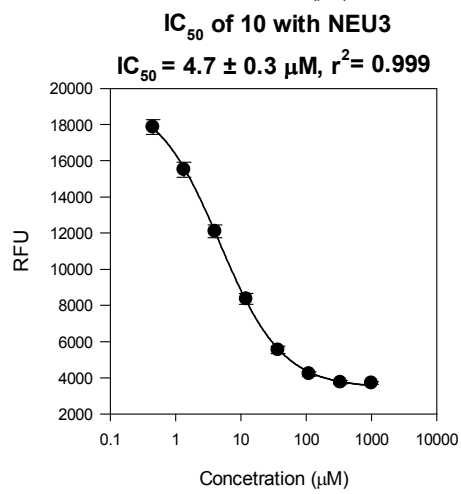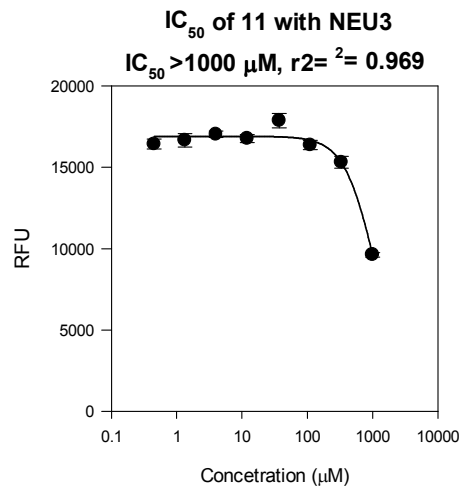

d -  $IC_{50}$  curves of  $IC_{50}$  of DANA (1) with NEU4  
 $IC_{50} = 13 \pm 1 \mu M, r^2 = 0.998$

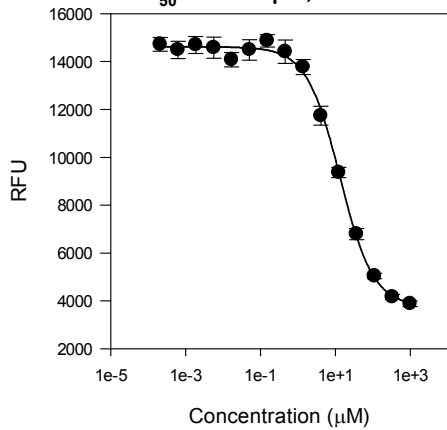

compounds 1-11 with NEU4  
 $IC_{50}$  of 2 with NEU4  
 $IC_{50} = 63 \pm 20 \mu M, r^2 = 0.983$

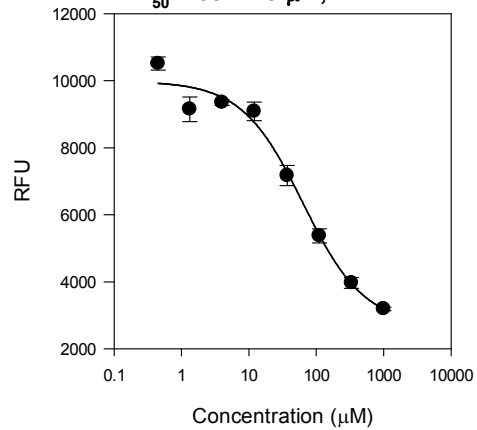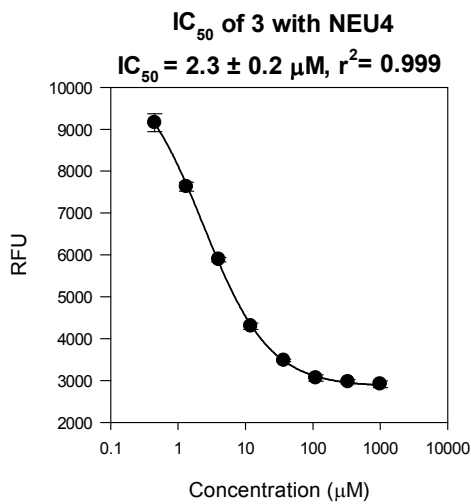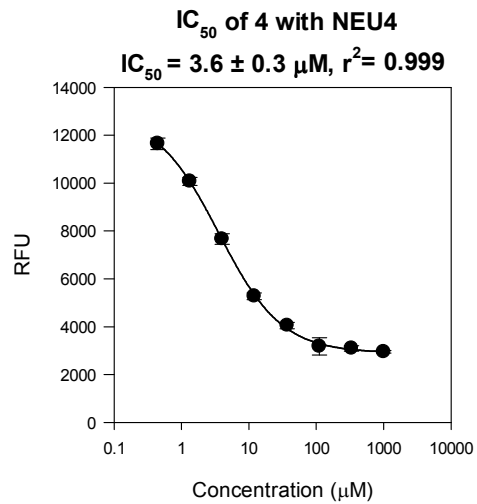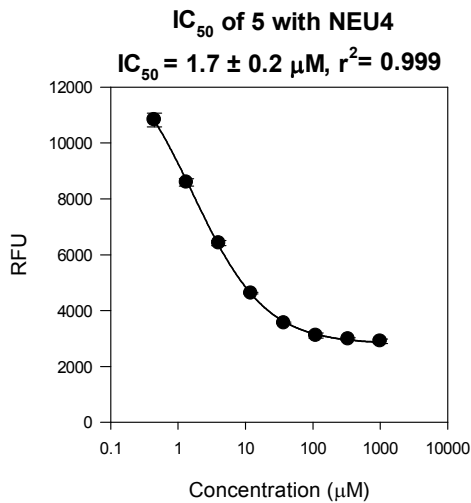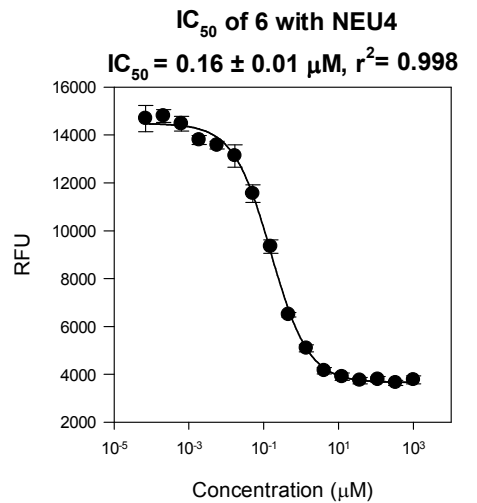

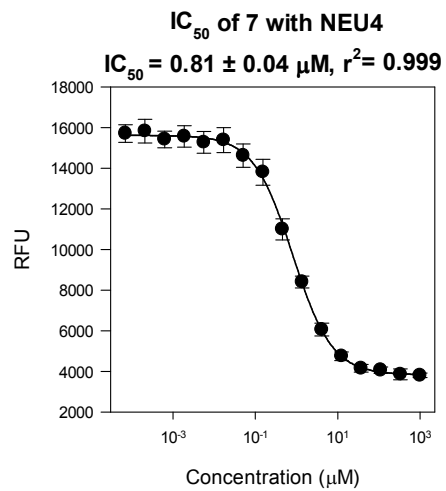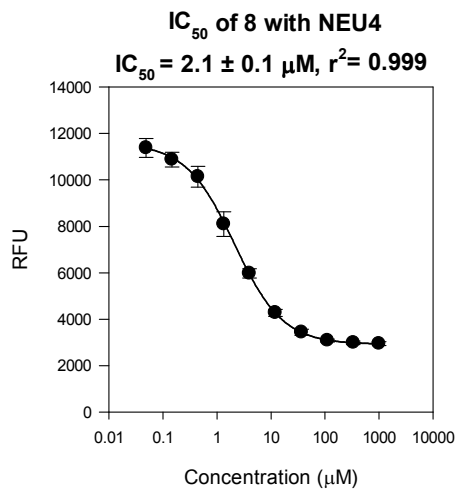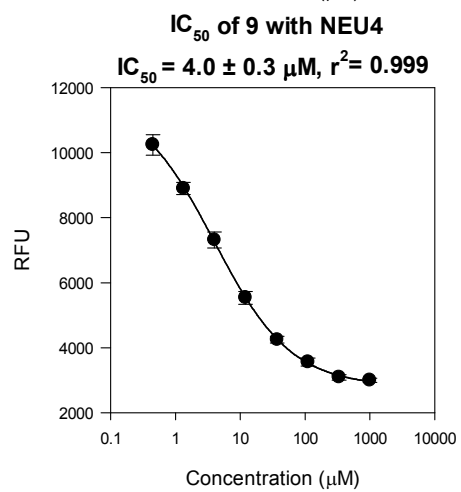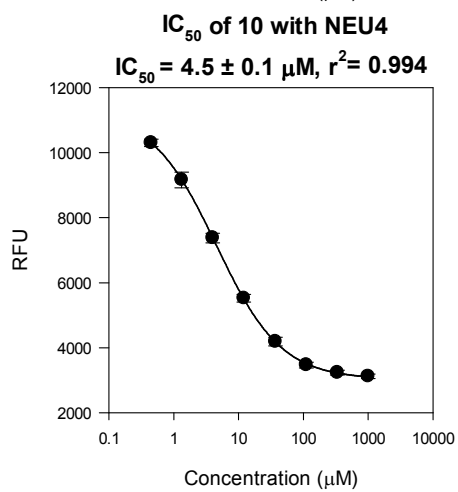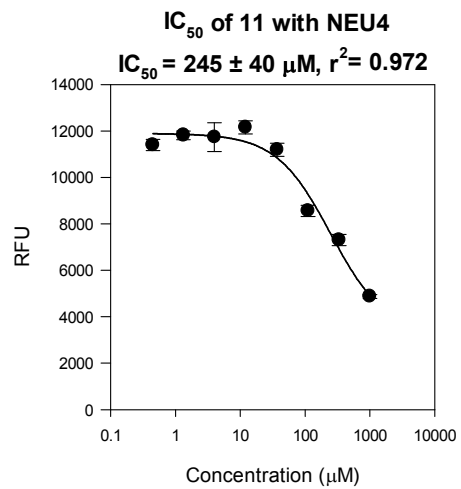



**Figure S14:  $K_i$  curves for compounds 6 and 7 with NEU4.**

Measurements were done according to protocol in Materials and Methods. The top left graph is the double reciprocal curve of rate and the substrate concentration at serial inhibitor concentrations (See table insert for legend and fit results). Plots of the slopes versus inhibitor concentration provide a linear curve ( $y= ab + c$ ) where  $K_i$  is found as  $-b/a$ .

**a-  $K_i$  of 6 with NEU4,  $K_i= 30 \pm 19$  nM**

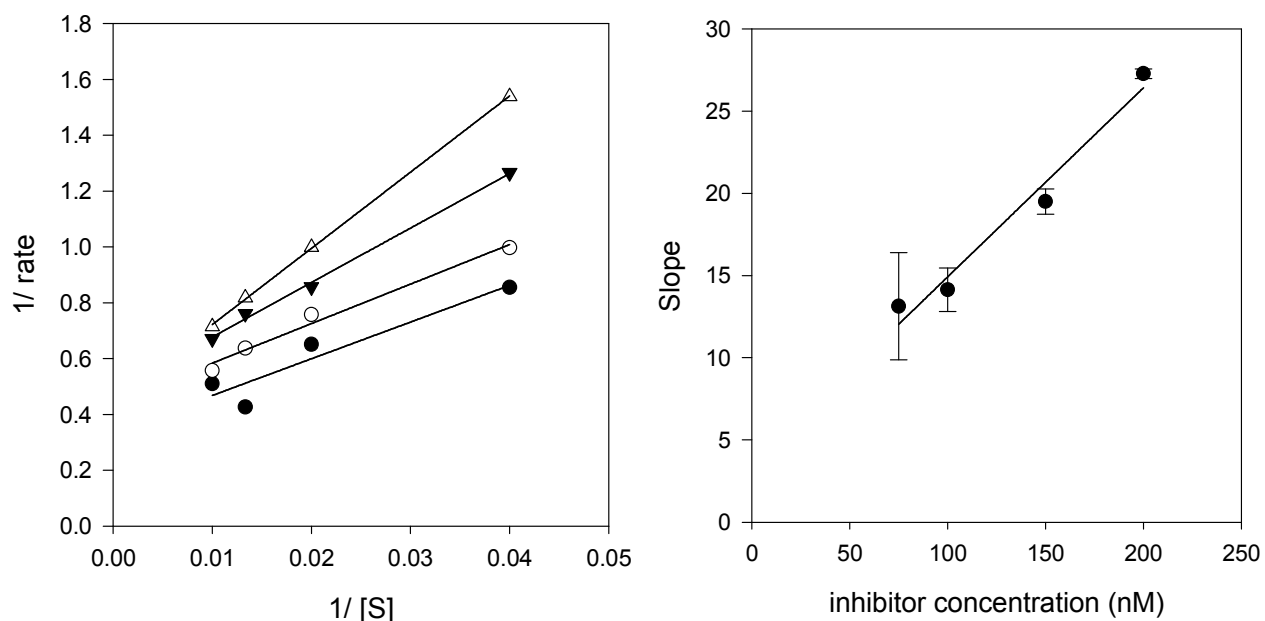

|                      | [I]<br>(nM) | Slope | $\pm$ | $r^2$ |
|----------------------|-------------|-------|-------|-------|
| $\triangle$          | 200         | 27.28 | 0.297 | 0.999 |
| $\blacktriangledown$ | 150         | 19.5  | 0.764 | 0.997 |
| $\circ$              | 100         | 14.15 | 1.332 | 0.983 |
| $\bullet$            | 75          | 13.13 | 3.269 | 0.890 |

$$y = 0.115x + 3.4135$$

$$r^2 = 0.9691$$

**b-  $K_i$  of 7 with NEU4,  $K_i = 60 \pm 16$  nM**

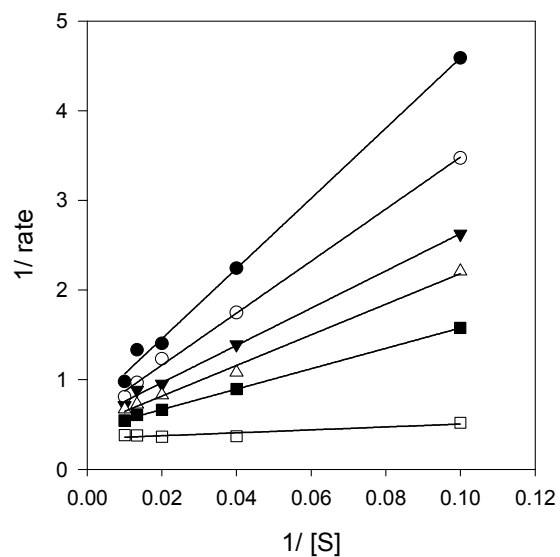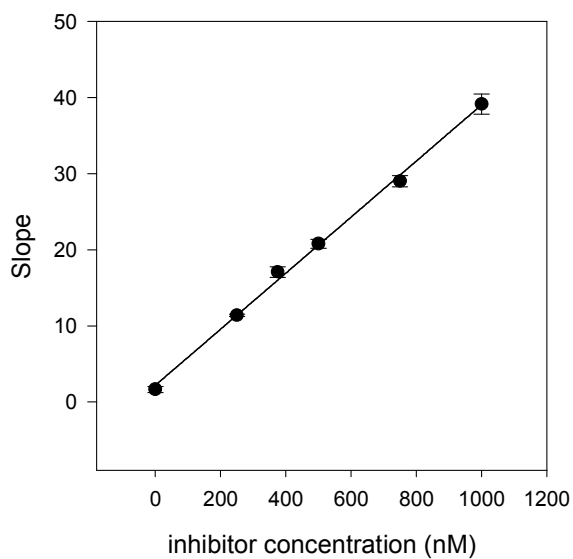

|   | [I]<br>nM | Slope  | $\pm$ | $r^2$ |
|---|-----------|--------|-------|-------|
| ● | 1000      | 39.147 | 1.321 | 0.997 |
| ○ | 750       | 29.006 | 0.739 | 0.998 |
| ▼ | 500       | 20.771 | 0.584 | 0.998 |
| △ | 375       | 17.077 | 0.694 | 0.995 |
| ■ | 250       | 11.372 | 0.129 | 0.999 |
| □ | 0         | 1.632  | 0.392 | 0.852 |

## Figure SI5: Quality of NEU4 homology model

The NEU4L sequence has an extended sequence (residues 287-374) that was could not be aligned to the NEU2 template. This region formed a disorganized loop in the final model. Evaluation of the model using Swiss-model assessment tools shows that the quality of the model as whole is moderate with a Z-score of -2.451, which is close to extreme values which are found in protein data bank (panel a). In terms of local score, most of the unreliable amino acids (shown in red) are part of the unaligned region, and the C-terminus of the protein (panel b). The Ramachandran plot shows that 97.4 % of the amino acids are found in favoured or allowed conformational regions, while 1.1% is in the generously allowed region, and 1.4% (5 amino acids) are in the disallowed region (panel c).<sup>2</sup>

a.

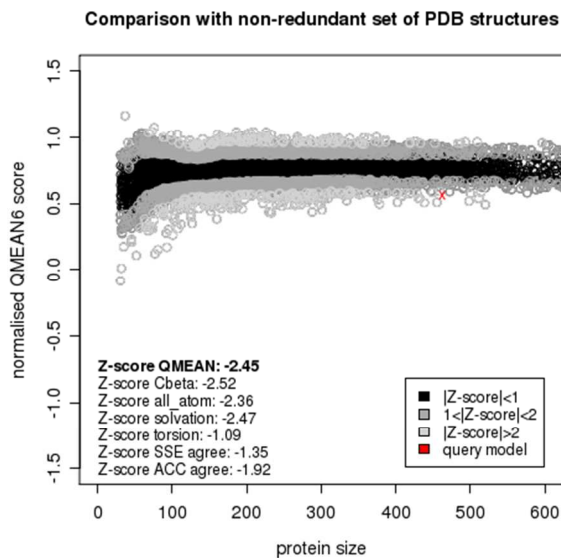

b.

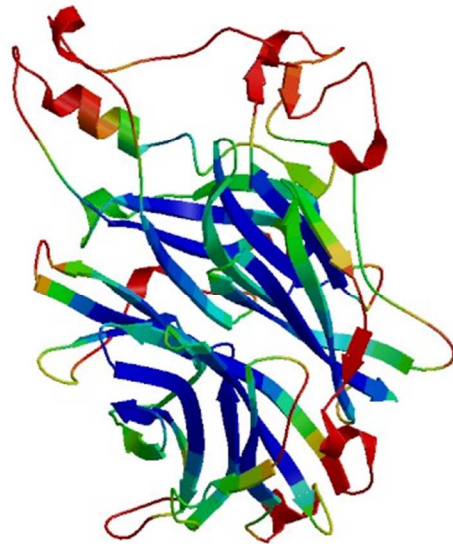

c.

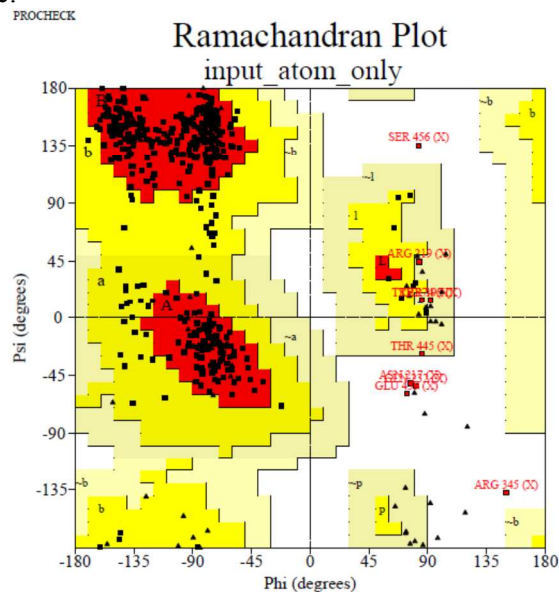

## Figure SI6: Convergence and total energy during molecular dynamics calculation

The total energy of the system was conserved during the calculation, indicating the stability of the system (panel a). Molecular dynamics calculations were run to convergence, as illustrated below (panel b).

a.

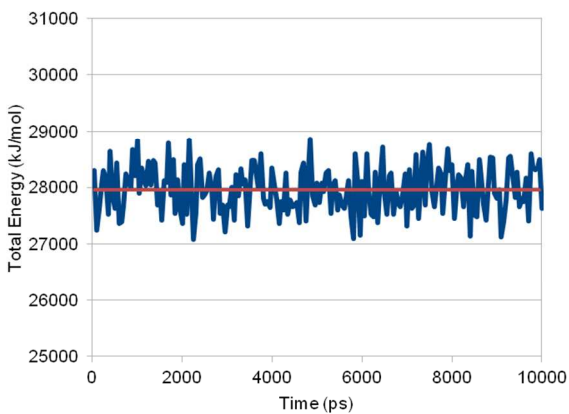

b.

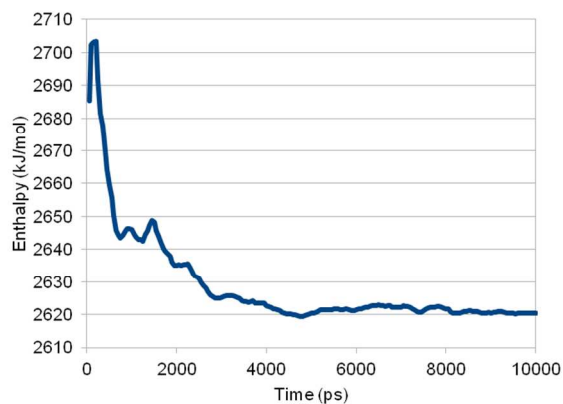

### Figure S17: Selectivity of compound 6 for NEU4 over NEU2

An overlay of our NEU4 homology model with a reported co-crystal of NEU2 illustrates one potential source of selectivity between these two isoenzymes. The proposed contacts between the C4'-sidechain and NEU4 are between R242, S243, and W274. Although the first two of these residues have identity in the NEU2 structure, the third is found on a loop (Loop 1, NEU4 R242-R248), which adopts a radically different orientation in the NEU2 structure. Loop 1 of the NEU2 structure obscures the pocket occupied by the C4'-sidechain in the NEU4 model.

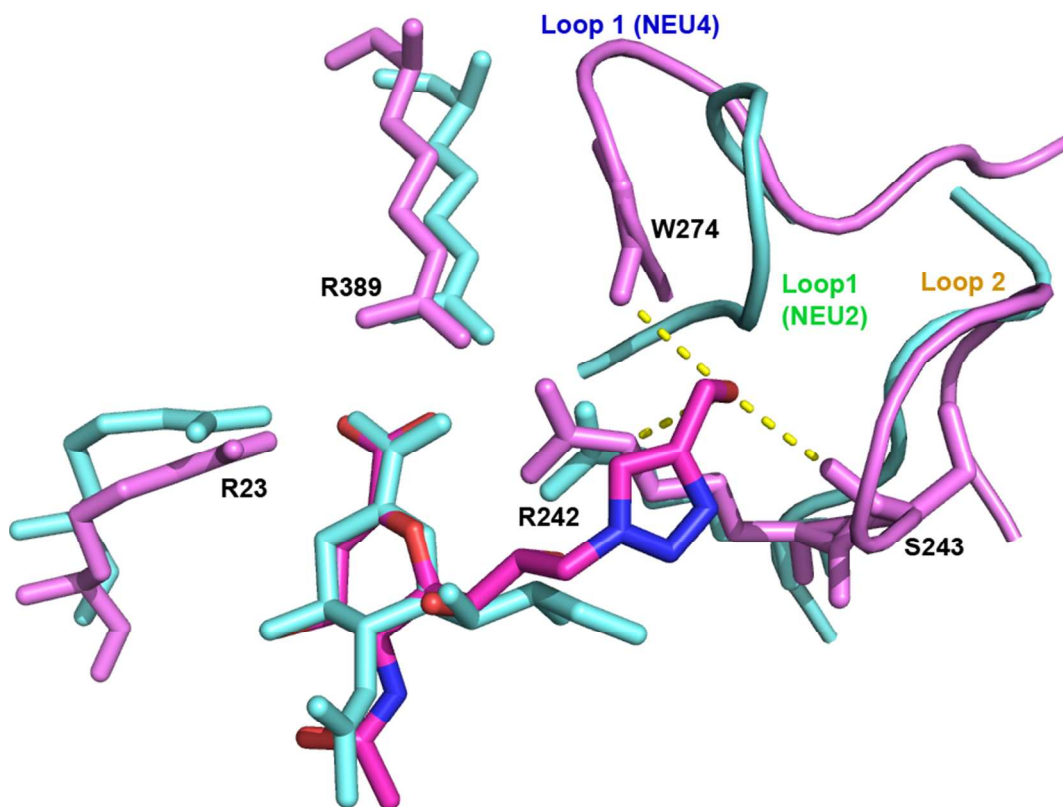

## Characterization of compound **6** ( $^1\text{H}$ NMR and HRMS).

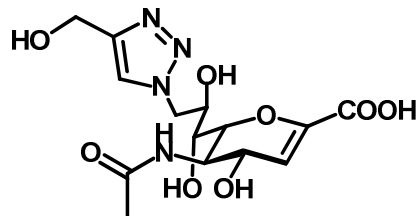

### (6) 5-Acetamido-9-[4-hydroxymethyl-[1,2,3]triazol-1-yl]-2,6-anhydro-5,9-dideoxy-D-glycero-D-galacto-non-2-enonic acid

The triazole, **6**, was synthesized as previously reported.<sup>1</sup>  $^1\text{H}$  NMR (600 MHz,  $\text{D}_2\text{O}$ )  $\delta$  8.10 (s, 1H,  $\text{H}_5$ ), 6.038-6.033 (d,  $J = 3.0$  Hz, 1H,  $\text{H}_3$ ), 4.87-4.75 (dd,  $J = 14.4$  Hz, 2.4 Hz, 1H,  $\text{H}_9$ ), 4.74 (s, 2H,  $\text{CH}_2$ ), 4.57-4.53 (dd,  $J = 14.4$  Hz, 4.2 Hz, 1H,  $\text{H}_9$ ), 4.50-4.48 (dd,  $J = 9.0$  Hz, 2.4 Hz, 1H,  $\text{H}_4$ ), 4.31-4.26 (m, 1H,  $\text{H}_8$ ), 4.26-4.24 (dd,  $J = 10.8$  Hz, 0.6 Hz, 1H,  $\text{H}_6$ ), 4.07-4.04 (dd,  $J = 10.8$  Hz, 3.0 Hz, 1H,  $\text{H}_5$ ), 3.50-3.49 (dd,  $J = 9.6$  Hz, 1.2 Hz, 1H,  $\text{H}_7$ ), 2.02 (s, 3H,  $\text{CH}_3$ ). HRMS (ESI) calculated for  $\text{C}_{14}\text{H}_{19}\text{N}_4\text{O}_8$  [ $\text{M}-\text{H}$ ] $^-$ , 371.1208, found 371.1208.

## References

1. Zou, Y.; Albohy, A.; Sandbhor, M.; Cairo, C. W. Inhibition of the human neuraminidase 3 (NEU3) by C9-triazole derivatives of 2,3-didehydro-*N*-acetylneuraminic acid. *Bioorg. Med. Chem. Lett.* **2010**, *20*, 7529-7533.
2. Benkert, P., Schwede, T. and Tosatto, S.C.E. QMEANclust: Estimation of protein model quality by combining a composite scoring function with structural density information. *BMC Struct Biol.* **2009**, *20*, 9:35
